1 **Short title:** Temporal changes in seed developmental metabolism

2

3 **Title:** Temporal changes in metabolism late in seed development affect biomass  
4 composition in soybean.

5

6 **Author names and affiliations:** Shrikaar Kambhampati<sup>1</sup>, Jose A. Aznar-Moreno<sup>2,#</sup>,  
7 Sally R. Bailey<sup>3</sup>, Jennifer J. Arp<sup>1</sup>, Kevin L. Chu<sup>1,3,4</sup>, Kristin D. Bilyeu<sup>5</sup>, Timothy P.  
8 Durrett<sup>2</sup>, Doug K Allen<sup>1,3 a</sup>

9

10 <sup>1</sup> Donald Danforth Plant Science Center, St. Louis, Missouri 63132, USA;

11 <sup>2</sup> Department of Biochemistry and Molecular Biophysics, Kansas State University,  
12 Manhattan, KS 66506, USA;

13 <sup>3</sup> United States Department of Agriculture, Agricultural Research Service, St.  
14 Louis, Missouri 63132, USA;

15 <sup>4</sup> Institute of Biological Chemistry, Washington State University, Pullman,  
16 Washington, 99164, USA;

17 <sup>5</sup> United States Department of Agriculture, Agricultural Research Service,  
18 Columbia, Missouri, 65211, USA;

19 # Present address: Centro de Biotecnología y Genómica de Plantas, Universidad  
20 Politécnica de Madrid, Pozuelo de Alarcón, Madrid, 28223, Spain.

21

22 <sup>a</sup> **Corresponding author:** Doug K Allen, [Doug.Allen@ars.usda.gov](mailto:Doug.Allen@ars.usda.gov)

23

24 **One-sentence summary:** Assessment of temporal changes in metabolism during  
25 soybean seed development indicated that lipid turnover during maturation contributes  
26 carbon for gluconeogenic production of carbohydrates.

27

28 **Author contributions:** D.K.A., T.P.D., and S.K. designed the research; J.A.A.-M.,  
29 performed RNA extraction and droplet digital PCR; J.J.A. performed PEPCK assay;  
30 K.L.C. quantified starch; S.R.B. performed CO<sub>2</sub> experiments and provided technical  
31 assistance to S.K.; K.D.B. developed the Jack-derived soybean germplasm. S.K.  
32 performed and analyzed data for all other experiments, wrote the article with  
33 contributions from all authors; D.K.A and T.P.D. supervised the research; D.K.A agrees  
34 to serve as the author responsible for contact and ensure communication.

35

36 **Funding information:** This work was supported by the United States Department of  
37 Agriculture, Agricultural Research Service, the United States Department of Agriculture,  
38 National Institute of Food and Agriculture through award number USDA-NIFA #2017-67013-  
39 26156, #2016-67013-24585, and the Multistate Research Project NC1203, the United  
40 Soybean Board (#1820-152-0134), National Institutes of Health (U01 CA235508), and the  
41 National Science Foundation (NSF-1812235). Support for the acquisition of the 6500  
42 QTRAP LC–MS/MS was also provided by the National Science Foundation (NSF-DBI  
43 #1427621).

44

45 **ABSTRACT**

46

47 The inverse correlation between protein and oil production in soybeans is well-  
48 documented; however, it has been based primarily on the composition of mature seeds.  
49 Though this is the cumulative result of events over the course of soybean seed  
50 development, it does not convey information specific to metabolic fluctuations during  
51 developmental growth regimes. Maternal nutrient supply via seed coat exudate  
52 measurements and metabolite levels within the cotyledon were assessed across  
53 development to identify trends in the accumulation of central carbon and nitrogen  
54 metabolic intermediates. Active metabolic operation during late seed development was  
55 probed through transient labeling with  $^{13}\text{C}$  substrates. The results indicated: i) a drop in  
56 lipid during seed maturation with a concomitant increase in carbohydrates, ii) a  
57 transition from seed filling to maturation phase characterized by quantitatively balanced  
58 changes in the carbon use and  $\text{CO}_2$  release, iii) changes in measured carbon and  
59 nitrogen resources supplied maternally over development, iv)  $^{13}\text{C}$  metabolites  
60 processed through gluconeogenesis towards sustained carbohydrate accumulation as  
61 the maternal nutrient supply diminishes, and v) oligosaccharide biosynthetic metabolism  
62 during seed coat senescence at maturation. These results highlight temporal  
63 engineering targets for altering final biomass composition to increase the value of  
64 soybeans and a path to breaking the inverse seed protein and oil correlation.

## 65 INTRODUCTION

66

67 The composition of a seed including protein, oil, and carbohydrate levels establishes its  
68 commercial value. In soybean [*Glycine max* (L.) Merr.], storage protein accounts for 35-  
69 40% of seed dry weight, with lipids (i.e., oil) accounting for 18-20%, predominantly as  
70 triacylglycerol (TAG) (Adams et al., 1983; Collakova et al., 2013; Li et al., 2015). At a  
71 value of approximately \$40 billion per year, soybean production is second only to corn  
72 in contribution from a crop to the US economy; United States Department of Agriculture  
73 (USDA), National Agriculture Statistical Services (NASS). Other biomass components,  
74 including carbohydrates, are of less market value, and a subset (i.e., raffinose family  
75 oligosaccharides (RFOs)) produced late in development cannot be metabolized for  
76 energy by monogastric animals. The RFOs include raffinose and stachyose and are  
77 considered anti-nutritional components of livestock feed, therefore detracting from seed  
78 value. In soybean, breeding efforts that increased protein content have resulted in lower  
79 yields (Mello Filho et al., 2004; Singh et al., 2016; Assefa et al., 2018) and the  
80 production of less TAG, indicating a tradeoff between protein and both yield and oil in  
81 mature seeds. Breaking the inverse correlations to improve the total seed value without  
82 compromising yields are unrealized goals of most breeding and biotechnological efforts.

83

84 Central carbon metabolic pathways are responsible for the production of storage  
85 reserves including lipids, proteins, and carbohydrates in plants. Though the network of  
86 central metabolism is highly conserved across species, there is significant diversity in  
87 biomass compositions within plant tissues, indicating that flux through the metabolic

88 pathways can vary extensively. For example, the level of lipids in reproductive organs  
89 can range from less than 1% in peas and lentils to greater than 70% in pecans and  
90 walnuts and up to 88% in mesocarp tissues such as palm (Dyer et al., 2008; Bates and  
91 Browse, 2012; Allen et al., 2015). Other organs such as leaves have low levels of lipids  
92 (<5%) in the forms of phospho- and galactolipids for membranes and very little storage  
93 lipid in the form of TAG (Lin and Oliver, 2008; Chapman et al., 2012). This variation  
94 indicates that steps in the metabolic network are pliable with throughput being context-  
95 specific across organs, species, and environments (Allen et al., 2015; Allen, 2016).  
96 However, resources available to a developing tissue such as a seed are finite, being  
97 constrained by the supply and form of exudates from the seed coat of the maternal  
98 plant, usually comprised of sugars (i.e., sucrose, glucose, fructose) and amino acids  
99 (glutamine, asparagine, alanine) (Rainbird et al., 1984; Fabre and Planchon, 2000;  
100 Schwender and Ohlrogge, 2002; Pipolo et al., 2004; Hernández-Sebastià et al., 2005;  
101 Allen et al., 2009). Thus, final seed composition, including oil and protein quantities, is a  
102 consequence of the availability of received assimilates and flux through enzymatic steps  
103 in metabolic pathways (Allen and Young, 2013; Truong et al., 2013). Understanding the  
104 differences in metabolic network flux and operation in tissues and species provides a  
105 template to engineer seeds or other organs with value-added compositions.

106

107 A quantitative description of temporal changes in metabolic network operation requires  
108 experimental methods that can probe stages of seed metabolism precisely and  
109 dynamically. Metabolite levels of primary intermediates such as amino acids, sugars,  
110 and organic acids decline throughout development while the storage components that

111 include RFOs, lipids, and proteins increase (Fait et al., 2006; Collakova et al., 2013; Li  
112 et al., 2015). These levels, however, are routinely reported on a “per gram” basis. As  
113 the content of storage components that are considered “inactive/inert pools” in  
114 developing seeds increase, the primary metabolites, i.e., “active pools”, are diluted as  
115 indicated by the hypothetical description (Figure 1A). Hence reports of metabolite  
116 levels must properly account for dilution due to reserve accumulation when comparing  
117 trends over development. Metabolite amounts when compared on a “per seed” basis  
118 take into account the increase in storage reserves and may portray more accurately the  
119 transient changes in accumulation (Figure 1B vs 1C).

120

121 One understudied developmental phase of metabolism is seed maturation. The process  
122 of desiccation involves more than drying, as indicated by enhanced enzyme activities  
123 and gene expression levels (Angelovici et al., 2010), and has important consequences  
124 on final reserve composition. However, hypotheses suggested by gene expression and  
125 final compositions require validation. Seed maturation represents ~40% of the entire  
126 seed developmental progression (Leprince et al., 2016) during which 10-15% of TAGs  
127 are turned over (Chia et al., 2005; Baud and Lepiniec, 2009; Baud et al., 2009) and  
128 coincidentally, carbohydrates such as RFOs and cell wall polysaccharides (CWPs)  
129 continue to accumulate. The metabolic fate of turned over lipid carbon is not clear, but  
130 as the supply of exogenous substrates from the maternal plant ceases, sources of  
131 carbon are needed to support biosynthetic demands (Baud et al., 2002; Baud and  
132 Graham, 2006; Angelovici et al., 2010). Genes involved in fatty acid oxidation and the  
133 glyoxylate cycle are expressed at higher levels late in development (Chia et al., 2005;

134 Fait et al., 2006), suggesting that altered tricarboxylic acid (TCA) cycle metabolism,  
135 which can vary extensively in seeds (Schwender et al., 2006; Alonso et al., 2007; Allen  
136 et al., 2009), might be necessary to meet differing demands (Rolletschek et al., 2003;  
137 Rolletschek et al., 2005; Tschiersch et al., 2011) when seed-based photosynthetic  
138 contributions decline (Borisjuk et al., 2005; Fait et al., 2006; Angelovici et al., 2010).  
139 Whether changes in mitochondrial respiration (Chia et al. 2005) and peroxisomal  
140 metabolism (Salon et al., 1988; Raymond et al., 1992; Eastmond et al., 2000; Eastmond  
141 and Graham, 2001) could explain repartitioning of carbon for demand late in seed  
142 development and support RFO and CWP production (Kuo et al., 1988; Sánchez-Mata et  
143 al., 1998; Fait et al., 2006; Collakova et al., 2013; Gawłowska et al., 2017) is unknown.

144

145 The result of lipid decreases and production of RFOs during maturation metabolism is a  
146 less valuable grain. Experimental results presented here suggest that turned over  
147 reserves, including lipids, provide carbon late in seed development necessary to sustain  
148 production of RFOs and CWPs. Temporal changes in seed biomass components, the  
149 maternal nutrient contribution, and concentrations of central carbon and nitrogen  
150 metabolic intermediates were used to study the changing operation of the metabolic  
151 network during seed development. Stable isotopes were used to probe cotyledon and  
152 seed coat metabolism specific to the maturation phase to describe changes in carbon  
153 partitioning late in development. The differences suggest an engineering opportunity to  
154 make seeds with value-added composition by paying attention to temporal effects.

155

156 **Results**

157

158 **Changes in soybean seed biomass composition during maturation decrease seed**  
159 **value**

160

161 Seeds were harvested according to size based on contemporary developmental stage  
162 descriptions (Naeve, 2005; Licht, 2014) (Figure 2A), removed from pods and seed  
163 coats, and weighed (fresh weight; FW). Cotyledons were dried to determine dry weight  
164 (DW) and moisture content (Figure 2B). R5 seeds were comprised of  $81.5 \pm 2.5\%$   
165 moisture, with seed desiccation events reducing this amount to  $53.4 \pm 0.5 \%$  in R7,  
166  $45.9 \pm 1.6 \%$  in R7.5, and  $12.9 \pm 0.8 \%$  in R8 (maturity). Further loss of moisture  
167 continued in mature seed over time to less than 9% dry weight categorized as R8b and  
168 R8c. The net CO<sub>2</sub> release from cotyledons was quantified and indicated a peak in CO<sub>2</sub>  
169 release at R6 followed by a rapid decline (Figure 2C). The measured CO<sub>2</sub> spike was  
170 consistent with differences in storage reserve production, including significant CO<sub>2</sub>  
171 generation when flux from pyruvate to acetyl-CoA enables fatty acid biosynthesis. The  
172 lipid production between R6 and R7 over a two week period accounts for 64% of the  
173 CO<sub>2</sub> generated in this time interval based on the accumulation of lipid in seeds (Figure  
174 3).

175

176 During maturation of cotyledons there was a small but insignificant drop in total protein  
177 accumulation from  $67.6 \pm 3.6 \text{ mg seed}^{-1}$  at R7 to  $59.7 \pm 4 \text{ mg seed}^{-1}$  at maturity ( $p =$   
178  $0.11$ ) and a more dramatic significant change in lipid from  $40 \pm 1.1 \text{ mg seed}^{-1}$  at R7  
179 down to  $30.4 \pm 0.2 \text{ mg seed}^{-1}$  at maturity ( $p = 0.004$ ) (Figure 3). Starch production



180 peaked at R6 ( $4.3 \pm 0.2$  mg seed<sup>-1</sup>) and declined sharply before leveling off at  $0.55 \pm 0.1$   
181 mg seed<sup>-1</sup>. Sucrose accumulation peaked at  $2.2 \pm 0.2$  mg seed<sup>-1</sup> during R7 and  
182 remained at that level until maturity, while the RFOs raffinose and stachyose  
183 accumulated between R6 and R7 to a maximum of 1.6 and 5.9 mg seed<sup>-1</sup>, respectively.  
184 Total free amino acids increased modestly throughout development (to 0.6 mg seed<sup>-1</sup> at  
185 R6), and the remaining biomass largely attributed to dietary fiber, including CWP,  
186 reached  $62.3 \pm 7$  mg seed<sup>-1</sup> at R8. All biomass components increased between R5 to  
187 R6, indicating that inverse correlations between individual components are not  
188 obligatory when sufficient resources were present. Starch turned over between R6 and  
189 R7, when significant lipids (67.5%) and RFOs (84.1%) were being synthesized.

190

191 **Vegetative carbon and nitrogen sources diminish prior to seed maturation in**  
192 **soybeans**

193

194 Vegetative parts of the plant are the source of sugars and amino acids for developing  
195 seeds during much of development (Hsu et al., 1984; Rainbird et al., 1984; Gifford and  
196 John, 1985; Egli and Bruening, 2001; Hernández-Sebastià et al., 2005) and impact final  
197 seed composition (Allen and Young, 2013); however, the provisions change as seeds  
198 mature. Unlike the significant liquid endosperm present in *Brassicaceae*, soybean seed  
199 coat exudate is barely detectable at any given stage in development and is present as a  
200 shiny wet surface on cotyledons that amounts to a few microliters and diminishes with  
201 development. To recover the maximum amount of seed coat exudate for measurements  
202 and minimize extraction from within the testa, the surface contents of the interior of the

203 seed coat were briefly extracted with an isotonic solution of 20 mM ammonium acetate,  
204 pH 6.5. The exterior surface of the developing cotyledon was also briefly immersed in  
205 the same buffer to capture and quantify the major contents of the exudate. An overall  
206 decreasing trend of total exudate metabolites (Figure 4) was observed during seed  
207 development. The total metabolite levels in the exudate decreased significantly as  
208 seeds approached maturation phase (R7 and R7.5), consistent with the trends in  
209 reserve accumulation (Figure 3) where no new storage proteins or lipids are made past  
210 R7, thus indicating a metabolic transition prior to maturation.

211  
212 Nine amino acids were measured at detectable levels in the exudate of all development  
213 stages. Alanine and lysine were detected in R5, R5.5, and R6. Methionine, threonine,  
214 tryptophan, serine, glycine, cysteine, tyrosine, and valine were not detected and must  
215 be generated from seed-based metabolism during development (Figure 4,  
216 Supplementary Table S1). The nitrogen rich amino acids asparagine, glutamine,  
217 arginine, and histidine were among the highest in content during peak protein  
218 accumulation stages (R5-R6), consistent with prior studies that indicated glutamine and  
219 asparagine are important sources of nitrogen for filling soybeans at least during early  
220 stages of development (Rainbird et al., 1984; Hernández-Sebastià et al., 2005). The  
221 accumulation of nitrogen-rich amino acids including aspartate, glutamate, and arginine  
222 during the last stage of development (from R7.5 to R8) could hint at the importance of  
223 nitrogen provision for amino acid biosynthesis during germination.

224

225 Sucrose was also a significant carbon source through R6 before decreasing (Figure 4,  
226 Supplementary Table S1), possibly due to raffinose and stachyose production from the  
227 seed coat at R7 and R7.5 stages. Prior reports that investigated RFOs in young  
228 developing seeds (Gomes et al., 2005; Kosina et al., 2009) suggested that the exudate  
229 contains precursors to RFO biosynthesis, i.e., sucrose, myo-inositol, chiro-inositol, and  
230 pinitol, but did not consider stages of development beyond R6. Data in the current study  
231 indicate RFOs are produced and exuded from the seed coat during the maturation  
232 phase, i.e., R7 and R7.5 (Figure 4, Supplementary Table S1).

233

### 234 ***In planta* levels of metabolites in cotyledons change throughout seed** 235 **development**

236

237 The pathway intermediates that are characteristic of stage-specific metabolism were  
238 investigated through pool size quantification (metabolite quantities) in cotyledons.  
239 Measurements were first obtained on a “per mg DW” basis and converted to amounts  
240 per (dried?) seed to account for the increasing inert pools (lipids, protein, and  
241 carbohydrates) over the course of development and enable comparison between  
242 different stages (Supplementary Table S2). A *k*-means clustering approach was used to  
243 compare changes in trends of metabolite pools over development (Figure 5). All  
244 measured amino acids except glutamine clustered into groups 1 and 5, consistent with  
245 protein accumulation and a demand for storage protein synthesis plateauing between  
246 R7 and R7.5 when storage protein accumulation stopped (Figure 3). The steep increase  
247 in amino acid content between R7.5 and R8 (more pronounced for cluster 5) along with  
248 the concomitant decrease in storage protein (Figure 3) suggested proteolytic activity

249 during maturation. Cluster 2 consisted of only two metabolites, glucose and fructose,  
250 which were elevated at R5 and dropped by R5.5. The variation within this cluster past  
251 R5.5 was high, likely due to an increase in glucose content past R6 that was not  
252 observed for fructose (Supplementary Table S2). The levels of glucose and fructose in  
253 R5 may be a consequence of sucrose breakdown, whereas the increase in glucose at  
254 R6 and R7 occurred when starch was turning over (Figure 3) supported by the presence  
255 of the starch degradation product maltose detected in R6 and R7 (Supplementary Table  
256 S2). Maltose, in cluster 3, was similar to the organic acids 2-oxoglutaric acid (2OG),  
257 malate, succinate, and fumarate involved in the tricarboxylic acid (TCA) cycle and the  
258 sugar phosphates 6-phosphogluconate (6PG), ribose 5-phosphate (R5P), and  
259 sedoheptulose 7-phosphate (S7P) involved in the oxidative and reductive steps of  
260 pentose phosphate pathway metabolism (PPP). Cluster 3 increased to R6 then  
261 declined, similar to measured net CO<sub>2</sub> release (Figure 2C), suggesting that CO<sub>2</sub>  
262 released in R6 resulted from TCA cycle and OPPP activity along with fatty acid  
263 biosynthesis, which is necessary to produce lipids during the same time frame.

264  
265 Metabolites in cluster 3 and cluster 4 (Figure 5) overlapped significantly based on the  
266 two-dimensional representation of clusters with principal component analysis (PCA). The  
267 common metabolites included those from glycolytic/gluconeogenic pathways and the  
268 Calvin-Benson Cycle. Non-overlapping metabolites (sucrose, galactinol, stachyose)  
269 were associated with RFO accumulation. The decrease in cluster 4 late in development  
270 was consistent with RFO production giving way to CWP biosynthesis (Supplementary  
271 Table S2).

272

273 **Lipid turnover supports biosynthesis of carbohydrate reserves late in**  
274 **development**

275

276 Both the supply of resources from the exudate and the metabolic events as indicated  
277 from the pool size comparisons and altered storage reserve profiles changed as seeds  
278 developed. Pool sizes are suggestive of changes in metabolism but the differences in  
279 pool sizes cannot be strictly attributed to altered biosynthetic or turnover rates. Given  
280 that protein and lipid levels decrease nearing maturity while CWPs and undesirable  
281 RFOs accumulate (Figure 3), isotope tracers were used to probe the movement of  
282 carbon into and out of metabolic pools. After validation of the culturing approach  
283 (Supplementary Data 1), labeled  $^{13}\text{C}_3$  glycerol was provided to cotyledons for up to 30  
284 minutes to examine metabolism specific to the lipid degradation at the beginning of  
285 maturation phase (R7).

286

287 R7 seeds incorporated glycerol to produce triose and hexose phosphates over the  
288 course of 30 minutes (Figure 6A), consistent with the capacity of operating enzymes  
289 gluconeogenically to convert trioses into carbohydrates. Glycerol was chosen in part  
290 because entry into metabolism as dihydroxyacetone phosphate (DHAP) would mimic  
291 the source of DHAP from the glycerol-3-phosphate backbone that remains after lipolysis  
292 late in development. By 30 minutes, labeled carbon originating from  $^{13}\text{C}_3$  glycerol was  
293 present at measurable levels in DHAP, GAP, PGA, G6P, G1P, and UDPG (Figure 6A),  
294 suggesting that gluconeogenesis may occur late in seed development. Labeling results

295 were further confirmed considering the activity of phosphoenolpyruvate carboxykinase  
296 (PEPCK), a key enzyme in gluconeogenic metabolism. PEPCK activity was highest at  
297 R7 (Figure 6B), consistent with gluconeogenic activity to supply carbon for carbohydrate  
298 metabolism at this stage (Figure 6C).

299

300 **Isotopic labeling of seed coats indicates production of oligosaccharides that are**  
301 **partitioned to the surface of maturing cotyledons**

302

303 The presence of RFOs in the exudate was unanticipated and may reflect biosynthetic  
304 activities in the seed coat. RFOs in seeds are not required for desiccation tolerance or  
305 germination (Dierking and Bilyeu, 2009; Valentine et al., 2017), and metabolism of the  
306 seed coat during development has not been previously described; thus the role of these  
307 oligosaccharides remains obscure. During development, the seed coat dry weight is  
308 reduced with age, indicating that it may be partially remobilized as the last filial tissue  
309 that provides reserves to the seed or could be helpful as an osmotic regulator during  
310 germination and the imbibition process. To test the contribution of the seed coat,  
311 detached seed coats from the R7 stage were labeled with  $^{13}\text{C}$ -sucrose, resulting in the  
312 production of  $^{13}\text{C}$ -raffinose (see methods for culture system set up) (Figure 7A, B). The  
313 soybean cultivar 'Jack' and a near isogenic ultra-low RFO line (Jack *rs2 rs3*) that  
314 contained natural variations in the two *raffinose synthase* genes *RS2* and *RS3* were  
315 used instead of Williams 82 due to the availability of the normal/ultra-low RFO near  
316 isogenic line pair (see methods for details) (Hagely et al., 2020). As shown in Figure 7C,  
317 a significant amount of  $^{13}\text{C}$  incorporation into raffinose within the seed coat was

318 observed in the WT line Jack relative to the ultra-low RFO line (Jack *rs2 rs3*). This result  
319 indicated unequivocally that RFOs result in part from seed coat metabolism and may be  
320 an important engineering target to favorably alter soybean seed composition.

321

## 322 **Discussion**

323

324 Mature seed composition is the cumulative effect of events throughout development  
325 and is a consequence of: a) supply of carbon, nitrogen, and other resources from the  
326 maternal plant, and b) seed-based metabolism. In this study we probed the changes in  
327 composition over seed development to explain the reduction in oil and protein levels  
328 and the accumulation of oligosaccharides late in development. Though inverse protein  
329 to oil relationships have been reported regularly (reviewed in Clemente and Cahoon,  
330 2009; Patil et al., 2017), the levels of these two reserves are not at odds during  
331 development (Kambhampati et al., 2019). Levels of both lipid and protein in the seed  
332 are highest during the initiation of the maturation phase and coincidentally decline at the  
333 time when CWPs are the only biomass component being accumulated (Figure 3) when  
334 little exogenous carbon is available (Figure 4) to support biosynthetic demands. Thus,  
335 the pull for carbon is not exclusive to oil and protein and their turnover is likely a source  
336 for production of other reserves.

337

338 **Seed-based carbon use efficiency indicates the redistribution of reserves to**  
339 **support metabolism late in development**

340

341 Carbon conversion efficiency or carbon use efficiency (CUE) has been described in  
342 seeds with flux analyses to account for the production of CO<sub>2</sub> relative to substrates  
343 taken up (Schwender et al., 2004; Alonso et al., 2007; Allen et al., 2009; O'Grady et al.,  
344 2012). Though the description provides an indication of carbon lost relative to that  
345 converted to biomass, the calculation also reflects the composition of the biomass.  
346 Seeds that make large amounts of lipid produce more CO<sub>2</sub> as a part of fatty acid  
347 biosynthesis than seeds that predominantly make starch. Green seeds capitalize on  
348 photosynthesis to improve carbon efficiency (Schwender et al., 2004; Allen et al., 2009).  
349 Thus the CUE calculation must take into consideration the metabolic context that differs  
350 amongst seeds and tissues.

351  
352 Analogously, the temporal dynamics of seed metabolism are self-evident from the  
353 dramatic change in seed appearance with development. Soybean seeds are green at  
354 R5 (Figure 2A) and are capable of productively using available sunlight (Ruuska et al.,  
355 2004; Borisjuk et al., 2005; Rolletschek et al., 2005; reviewed in Angelovici et al., 2010)  
356 due in part to the contribution of Rubisco-based CO<sub>2</sub> fixation (Schwender et al., 2004;  
357 Allen et al., 2009). CUEs for stages in metabolism were calculated based on differences  
358 in composition and CO<sub>2</sub> production over developmental stages, resulting in values of  
359 90% and 76% between R5-R6 and R6-R7, respectively (Supplementary Table S3).  
360 Prior reports (Allen et al., 2009) that focused exclusively on seed filling indicated  
361 reasonable agreement with these early stages. During this time, the spike in CO<sub>2</sub>  
362 production occurs when lipid production is high and seeds are starting to transition from  
363 green to yellow in color (Figure 2C). TCA cycle metabolism and elevated oxidative PPP



364 were also supported during this interval based on related metabolite clustering analysis  
365 (Figure 5). Later in development, differences in CO<sub>2</sub> production correlated with parallel  
366 drops in TCA cycle and OPPP metabolite levels (cluster 3 of Figure 4).

367

368 As seeds continue to develop, the CUE calculation is no longer applicable because the  
369 supply of exudate from the maternal plant is exhausted. Instead the balance of one  
370 reserve turned over should equate with production of other reserves and CO<sub>2</sub>, to avoid  
371 violation of mass conservation. Developmental staging showed that starch levels drop  
372 (Figure 2) to supply other needs including RFO and lipid biosynthesis. From R7 to  
373 maturation, the balance of carbon turned over as lipid and protein must account for new  
374 production of carbohydrates and CO<sub>2</sub> generated. The reported changes in storage  
375 reserves (Supplementary Table 3) indicated a balance that was 94% closed. The  
376 production of some CO<sub>2</sub> late in development may suggest a slight decrease in final  
377 seed biomass with desiccation; however, the change in seed weight was not statistically  
378 significant.

379

380 Interestingly, pertaining to RFO production, our results suggested biosynthesis at  
381 multiple locations, with carbon supplied from turned over storage reserves in the  
382 cotyledon and also as a result of the withering of the seed coat during dessication. <sup>13</sup>C<sub>12</sub>  
383 sucrose incubation (i.e., a precursor to raffinose) with seed coats indicated production of  
384 RFOs (Figure 7) and suggests that the reduction in seed coat biomass during  
385 maturation may be analogous to a senescence process where the carbohydrate in the  
386 seed coat is converted to RFOs at the surface of the cotyledon.

387

388 **Gluconeogenic activity is temporally synchronized with lipid degradation to**  
389 **supply turned over carbon for carbohydrate biosynthesis**

390

391 Steady-state metabolic flux analysis using developing soybean seeds previously  
392 indicated that gluconeogenic metabolism does not occur when seeds receive adequate  
393 supplies of sugars (Allen et al., 2009). However, the composition of seed exudate late in  
394 development indicates that seeds do not receive an extensive supply of sugars from the  
395 maternal plant at these stages (Figure 4). As shown with  $^{13}\text{C}_3$  glycerol labeling  
396 experiments (Figure 5A), enzymes involved in shuttling carbon to hexose phosphates  
397 can operate effectively late in development so that carbon can be used to produce  
398 carbohydrates (RFOs and CWP).  $^{13}\text{C}$  enrichment occurred in intermediates of  
399 glycolysis (DHAP, PEP), hexose phosphates (G6P, G1P), and the nucleotide sugar  
400 UDPG, which are precursors to carbohydrate production (Figure 6). From the balance of  
401 biomass components (Supplementary Table 3), the  $\text{CO}_2$  loss of 3.3 mg (calculated)  
402 could come from PEPCK activity (61%; see Supplementary Table 3 for details) which  
403 was highest at R7.

404

405 The carbon required for PEPCK activity is likely obtained via the glyoxylate cycle, which  
406 utilizes acetyl-CoA derived from repeated deacylation of lipids beginning at R7 and  
407 continuing throughout the maturation phase by  $\beta$ -oxidation. The key enzymes required  
408 for glyoxylate cycle and  $\beta$ -oxidation, isocitrate lyase (ICL), malate synthase (MS), 3-  
409 ketoacyl-CoA thiolase (KAT), and the multifunctional enzyme (MFP) of  $\beta$ -oxidation, were

410 previously shown to increase in activity during the maturation phase of embryo  
411 development in *Brassica napus*, characterized by lipid degradation (Chia et al., 2005).  
412 We observed that the glyoxylate levels increased over the course of development,  
413 peaking at R7 and R7.5 (cluster 4 of Figure 5, Supplementary Table 2). Further, activity  
414 of the glyoxylate cycle and gluconeogenesis are supported by prior measurements of  
415 transcript abundance over soybean development (Collakova et al., 2013; Li et al.,  
416 2015). The differences in carbon movement between the R6 stage of seed filling and  
417 initiation of maturation at R7 are stark and are summarized in Figure 8. Carbon  
418 received as sucrose via maternal contribution in R6 is channeled into lipid biosynthesis  
419 at R6. As the maternal contribution decreases between R6 to R7, starch turnover may  
420 contribute carbon to both lipid and oligosaccharide biosynthesis while TCA cycle  
421 operation sustains the energy required for oligosaccharide production. As the seeds  
422 reach the R7 maturation phase, turnover of lipids is initiated and the carbon from the  
423 glycerol backbones of lipids as well as degraded acyl chains is channeled into cell wall  
424 polysaccharides via gluconeogenic and  $\beta$ -oxidative pathways, respectively.

425  
426 Recent efforts to improve seed quality have targeted lipases to reduce lipid breakdown  
427 late in development (Kanai et al., 2019) and RFO biosynthetic steps (Valentine et al.,  
428 2017; Hagely et al., 2020) to improve seed compositional traits without significant  
429 phenotypic consequences to maturation or germination. Carbohydrates as a whole  
430 (RFOs and CWPs) constitute ~40% of final seed composition and are an important sink  
431 and potentially rob carbon from the production of oil and protein. Hence, future  
432 engineering efforts for increased oil and protein, if focused on manipulating key carbon

433 partitioning pathway nodes that consider all three biomass components, can be fruitful  
434 in breaking the perceived inverse correlation. Improved channeling of carbon from  
435 malate towards lipid using malic enzyme (Allen and Young, 2013) temporally and  
436 increasing the sink strength of developing seeds (Rolletschek et al., 2020) by  
437 manipulating the hormone status (Quoc Thien et al., 2016; Kambhampati et al., 2017)  
438 represent unrealized potential targets for future soybean improvement.

439

#### 440 **Materials and Methods:**

441

#### 442 **Plant growth conditions and tissue collection for *in planta* and seed coat exudate** 443 **measurements**

444

445 Soybean cultivar, Williams 82, was grown under greenhouse conditions as previously  
446 described (Kambhampati et al., 2019). Germinating seeds were transferred to one-  
447 gallon pots containing Fafard 4M and grown at 25°C-27°C/21°C-23°C day/night  
448 temperatures with greater than 35% humidity and sunlight supplemented by  
449 approximately 400-1000 Wm<sup>-2</sup> to establish a 14 hr day, 10 hr night photoperiod. Plants  
450 were watered daily and received Jack's 15-16-17 (JR Peters) fertilizer three times a  
451 week. Developing seeds were grouped based on fresh weight and visual appearance to  
452 determine the developmental stage (Figure 1). At the time of harvest, seeds that were  
453 used as controls representing *in planta* conditions were dissected from pods, the seed  
454 coat was removed and cotyledons were flash frozen with liquid nitrogen and stored at -  
455 80°C until further use. Cotyledons collected from a single plant were treated as a single

456 biological replicate for all stages of development. Tissue that belonged to each replicate  
457 was ground individually using machined home-made stainless-steel hammer-crushing  
458 pestle and mortar design. Ground and frozen tissue was then lyophilized and aliquoted  
459 for individual biomass component and metabolite measurements.

460

461 For exudate experiments an isotonic solution of 20 mM ammonium acetate pH 6.8 was  
462 placed on the interior side of excised seed coats and pipeted up and down repeatedly  
463 for 10 seconds. In addition, the surface of the corresponding cotyledon was rinsed with  
464 the same solution to collect any surface contents. The extracts from each stage were  
465 dried using a speed vacuum centrifuge and resuspended in water and filtered using  
466 0.45  $\mu\text{m}$  cellulose acetate centrifuge filters (costar®, Corning Inc.) prior to metabolite  
467 measurements using LC-MS/MS.

468

#### 469 **Moisture content, fresh weight, dry weight, and net CO<sub>2</sub> measurements**

470

471 Moisture content was determined using fresh weight and dry weight measurements.  
472 Seeds were weighted immediately after harvesting to obtain fresh weights, sliced and  
473 dried in an oven. Dried seeds were measured at least three times over the course of  
474 several weeks to ensure no moisture remained and the weights plateaued. CO<sub>2</sub>  
475 measurements were taken from whole soybean cotyledons, after excising the pod walls  
476 and seed coats, using a LI-COR 6400 with an attached insect respiration chamber  
477 (#6400-89) following manufacturers protocol. Five replicates with three cotyledons each  
478 and ten measurements were used with readings taken every 20 to 30 seconds. 30  $\mu\text{E}$  of

479 light was maintained throughout the measurement period to simulate light received by  
480 the cotyledons within the pods (Allen et al., 2009).

481  
482 **Normal seed RFO soybean cultivar ‘Jack’ and the ultra-low RFO derivative ‘Jack**  
483 ***rs2 rs3***

484 An ultra-low RFO version of soybean cultivar ‘Jack’ (Jack *rs2 rs3*) was developed by  
485 backcrossing variant alleles of the raffinose synthase 2 (*rs2*) and raffinose synthase 3  
486 (*rs3*) genes into Jack (Hagely et al., 2020). The ultra-low RFO phenotype has been  
487 defined as raffinose and stachyose content less than 0.70% of seed dry weight (Hagely  
488 et al., 2013; Schillinger JA, 2013, 2018).

489  
490 **<sup>13</sup>C labeled culture system set up and conditions**

491  
492 For culturing system development, cotyledons from specific stages were excised from  
493 seed coats under sterile conditions and immediately placed flat face down for each  
494 cotyledonary half into 300 µL of sterile culture medium in a 24-well plate. A modified  
495 Linsmaier and Skoog medium (Thompson et al., 1977; Hsu and Obendorf, 1982) with  
496 Gamborg’s vitamins (Sigma) and 5 mM MES buffer adjusted to pH 5.8 was used as the  
497 culture medium and contained 200 mM U-<sup>13</sup>C<sub>6</sub> glucose as the exclusive carbon source.  
498 Culturing was performed under 30 – 35 µE continuous light at 26°C, consistent with  
499 Allen et al. (2009) and tissue was collected at 5, 10, and 30 mins, in triplicates, for all  
500 time course studies described. Untreated samples were also taken in triplicates for 0  
501 timepoint (*in-planta*) measurements. At the conclusion of labeling experiments, the

502 metabolism was quenched by a very brief rinse of the cotyledon surface with water prior  
503 to slicing off layers of the cotyledon to assess label uptake, metabolism, and  
504 heterogeneity (see Supplementary Data 1 for details). Slices were rapidly frozen in  
505 liquid nitrogen and stored at  $-80^{\circ}\text{C}$  until extraction.

506

507 To investigate carbon turnover from lipids to carbohydrates, we substituted U- $^{13}\text{C}_6$   
508 glucose with  $^{13}\text{C}_3$  glycerol (15 mM) as the sole source of carbon.  $^{13}\text{C}_{12}$  Sucrose (100  
509 mM) was used as the carbon source for data presented in Figure 7. The salts and  
510 vitamins in all individual labelling experiments remained the same as above. The bottom  
511 slice of labeled seeds was used for metabolite extraction and measurements of  
512 isotopologue distribution (see Supplementary Data 1 for rationale).

513

#### 514 **RNA extraction and transcript analysis for verification of culturing system**

515

516 Total RNA was extracted from soybean seed slices using the RNeasy Plant Mini Kit  
517 (Qiagen) according to the supplier's instructions. cDNA was synthesized using the  
518 qScript cDNA SuperMix (Quantabio) from 1  $\mu\text{g}$  total RNA previously treated with DNase  
519 I (Merck). For droplet generation, 20  $\mu\text{l}$  of PCR reaction (cDNA, primers and the Bio-  
520 Rad ddPCR supermix) and 70  $\mu\text{l}$  of droplet generation oil were transferred to the middle  
521 and to the bottom rows respectively of a DG8<sup>TM</sup> Cartridge before insertion into a QX200  
522 Droplet Generator. The genes used and the primer sequences are included in  
523 Supplementary Table S4. Droplets were transferred to a 96-well plate for PCR  
524 amplification in a thermal cycler C1000 Touch<sup>TM</sup>. The cycling protocol was  $95^{\circ}\text{C}$

525 enzyme activation for 5 min followed by 40 cycles of a two-step cycling protocol of 95 C°  
526 for 30 seconds and T<sub>m</sub> (Supplementary Table S4) for 1 min, then 4 °C for 5 min and 90  
527 °C for 5min. Following PCR amplification, the plate containing the droplets was placed  
528 in a QX200 droplet reader. Droplet digital PCR (ddPCR) data was analysed with Bio-  
529 Rad QuantaSoft Analysis Pro Software. The *Glycine max* ATP synthase subunit 1  
530 (Glyma12g02310) and SKIP16 (Glyma12g05510) were used as internal references (Hu  
531 et al., 2009).

532

### 533 **Extraction of polar and non-polar metabolites**

534

535 Metabolite extraction was carried out following the protocol described in Czajka et al.  
536 (2020)) and Kambhampati et al. (2019)) with a few modifications. Briefly, the stored  
537 samples were removed from -80°C and two metal beads were added to each tube along  
538 with 1 ml 7:3 methanol/chloroform (-20°C) and a PIPES (piperazine-N,N'-bis[2-  
539 ethanesulfonic acid]), norvaline, and ribitol mixed standard. Samples were kept on ice  
540 throughout extraction unless otherwise noted. Samples were pulverized using a ball mill  
541 at 28 Hz for 5 minutes or until fully ground. The mixtures were then incubated at -20°C  
542 for 3 hrs, with intermittent vortexing to ensure complete extraction. 500 µL of ddH<sub>2</sub>O  
543 (4°C) was added to each sample and vortexed vigorously before being centrifuged at  
544 14,000 rpm at 4°C for 10 minutes during which the samples phase-separated. The  
545 upper aqueous phase containing water-soluble metabolites was transferred to a 1.5 mL  
546 eppendorf tube with a 0.45 µm centrifugal filter (Costar®, Corning Inc.) and spun at  
547 14,000 rpm at 4°C for 2 mins. This solution was then transferred to glass vials (Agilent,



548 Xpertek) for LC-MS/MS analysis to detect soluble sugars, free amino acids and sugar  
549 phosphates.

550

### 551 **Quantification of proteins, lipids, and starch**

552

553 3-5 mg of ground lyophilized tissue was subjected to liquid hydrolysis and protein was  
554 measured using amino acid compositional analysis as described in Kambhampati et al.  
555 (2019). In brief, 20  $\mu$ L of 1 mM cell free  $^{13}$ C-labelled amino acid standard mix (Sigma)  
556 was added to the protein pellet and dried using a speed vacuum centrifuge. 50  $\mu$ L of 4M  
557 methanesulphonic acid containing 0.2% tryptamine was added to this dried pellet and  
558 incubated at 110°C for 22 hours. Upon completion of hydrolysis, the samples were  
559 neutralized using 50  $\mu$ L of 4M sodium hydroxide, briefly vortexed and dried. Upon  
560 drying, the samples were resuspended in 1 mL ultra pure water and vortexed to recover  
561 the hydrolyzed amino acids and then filtered using 0.45  $\mu$ M centrifugal filters. Amino  
562 acids were detected using LC-MS/MS (described below) and quantified using isotopic  
563 dilution based on peak areas obtained from known concentrations of internal standards.  
564 The sum of the concentrations of all 20 amino acids, in milligrams, was used to  
565 establish the concentration of protein (Supplementary Table S5).

566

567 Analysis of lipid content was carried out according to an adapted version of the method  
568 described in Allen and Young (2013)) by converting total lipids into Fatty Acid Methyl  
569 Esters (FAMES). In brief, freshly prepared 5% sulfuric acid:methanol (v/v) was added to  
570 ~20 mg of ground lyophilized tissue along with 25  $\mu$ L 0.2% butylated hydroxytoluene

571 (BHT) in methanol to prevent oxidation and two internal standards, triheptadecanoin  
572 and tripentadecanoin, before heating at 110°C for 3 hours, vortexing hourly. After  
573 cooling to room temperature, 0.9% NaCl (w/v) was added to each sample to quench the  
574 reaction. The FAMES were then extracted using hexane and quantified by gas  
575 chromatography-flame ionization detection (GC-FID) using a DB23 column (30 m, 0.25-  
576 mm i.d., 0.25- $\mu$ m film; J&W Scientific). The GC was operated in a split mode (30:1). The  
577 flame ionization detector was operated with a temperature of 250°C with an oven  
578 temperature ramp profile from 180°C to 260°C at a rate of 20°C min<sup>-1</sup> followed by a hold  
579 time of 7 mins. Comparisons of peak areas to the two internal standards were used for  
580 quantification.

581  
582 Starch measurements were performed on ~20 mg of ground lyophilized tissue, directly  
583 without prior extraction. Total starch content in cotyledons over reproductive  
584 development was determined, in triplicates, using the Megazyme starch assay kit  
585 (Megazyme International Ireland), using the AOAC Official Method 996.11 (Approved  
586 Methods of the AACC,(McCleary et al., 1997; McCleary et al., 2019)) modified to adjust  
587 the final assay volume for 96-well plate reader compatibility. Briefly, the ground  
588 lyophilized tissue was washed twice with 80% ethanol at 85°C prior to heating at 110°C  
589 for 10 min with DMSO. The samples were then treated with  $\alpha$ -amylase at 110°C for 12  
590 minutes (vortexing every 4 min) followed by amyloglucosidase at 50°C for 1 hour. The  
591 samples were then centrifuged, supernatant collected, and incubated with the GOPOD  
592 reagent at 50°C for 20 min. The absorbance at 510 nm was measured using a  
593 spectrophotometer, and the starch content was determined by comparison with a

594 standard curve generated using a serial dilution of starch standards treated the same  
595 way as biological samples. Quantities of all biomass component measurements  
596 presented in Figure 2 are provided as Supplementary Table S6.

597

598 **Quantification of soluble sugars, amino acids, and sugar phosphates using**  
599 **HPLC-MS/MS**

600

601 Sugars and sugar phosphates were analyzed from the water-soluble fraction using a  
602 Shimadzu (UFLCXR) HPLC system connected to an AB Sciex triple quadrupole MS  
603 equipped with Turbo V™ electrospray ionization (ESI) source using the method  
604 described in Czajka et al. (2020)). Negative ion mode was used to monitor sugar and  
605 sugar phosphate fragments. A 5 µl sample was injected on the Infinity Lab poroshell  
606 120 Z-HILIC column (2.7 µm, 100 x 2.1 mm; Agilent technologies, Santa Clara, CA,  
607 USA) and the metabolites were eluted with an increasing gradient of acetonitrile: 10 mM  
608 ammonium acetate (90:10 v/v) and 5 µm medronic acid, pH 9.0 (A) and 10 mM  
609 ammonium acetate in water, pH 9.0 (B). The flow rate was 0.25 mL/min. Sugars and  
610 sugar phosphates were separated using a binary gradient of 95-70% B over 8 minutes  
611 then to 50% B over the next 4 min followed by a hold at 25% B for 1.5 min. The gradient  
612 was then decreased to 30% B over 0.5 min followed by a hold for 1 min before returning  
613 to 95% B to re-equilibrating the column for 6 min. The HPLC eluent was introduced into  
614 an electrospray ionization source with the following conditions: ion spray voltage, 4.5 kV  
615 (ESI-); ion source temperature, 550°C; source gas 1, 45 psi; source gas 2, 40 psi;  
616 curtain gas, 35 psi and entrance potential, 10. Ions were detected and monitored using

617 a targeted MRM approach with the parameters optimized by direct infusions, provided in  
618 supplementary Table S7, for accurate quantification. The value for entrance potential  
619 was default (-10) for all analytes. For absolute quantification, data were analyzed using  
620 the quantitation wizard available in Analyst (v. 1.6.2) software (AB SCIEX, Concord,  
621 Canada). Metabolite concentrations were calculated based on a calibration curves.  
622 Recoveries were assessed using ribitol and PIPES as internal standards for sugars and  
623 sugar phosphates, respectively.

624  
625 Amino acids were measured using the same instrumentation and column as described  
626 above, with the following changes in mobile phases, gradient and ionization conditions;  
627 Mobile phase A consisted of 20mM ammonium formate in water, pH 3.0, and B was  
628 composed of 90% acetonitrile and 10% water with a final concentration of 20 mM  
629 ammonium formate, pH 3. 3  $\mu$ L from each sample were injected and a flow rate of 0.25  
630  $\mu$ L was used for separation of amino acids on the HPLC column. A binary gradient  
631 composed of 100-90% B over 2 minutes, 90-50% B over the next 6 minutes followed by  
632 returning to 100% B over 30 seconds and re-equilibration of 5.5 minutes was used to  
633 separate the analytes. The HPLC eluent was introduced into an electrospray ionization  
634 source with the following conditions: ion spray voltage, 4.5 kV (ESI+ and ESI-); ion  
635 source temperature, 400°C; source gas 1, 45; source gas 2, 40; curtain gas, 35 and  
636 entrance potential, 10. Ions were detected and monitored using a targeted MRM  
637 approach using parameters included within Supplementary Table S7. Data were  
638 analyzed similar to sugars and sugar phosphates described above, except novaline was  
639 used as an internal standard to assess recoveries. All statistical analysis and data

640 visualization were performed using Microsoft Excel (2013) or R programming language  
641 (R CoreTeam, 2013) using base functions and the package ggplot2 (Wickham, 2016).

642

### 643 **Quantification of Isotopologue abundance and average labeling**

644

645 The LC-MS/MS conditions used for label detection are identical to the ones described  
646 above with the exception of MRM transitions used (Supplementary Table S8) that were  
647 selected based on Kappelmann et al. (2017). Peaks were manually integrated and the  
648 natural abundance was corrected using the R package IsoCorrectoR (Heinrich et al.,  
649 2018). Fractional enrichment of the corrected isotopologues (M0-Mn) obtained from  
650 IsoCorrectoR was used to calculate average labeling. Average labeling was calculated  
651 as described in Buescher et al. (2015) using the following equation;

$$\% \text{ }^{13}\text{C enrichment} = \frac{\sum_{i=0}^n i \cdot S_i}{n} \cdot 100$$

652 where  $i$  denotes the mass isotopologue,  $n$  is the number of possible  $^{13}\text{C}$  carbons, and  $S$   
653 is the fraction of the labeled isotopologue. For detailed calculations see Supplementary  
654 Table S9.

655

### 656 **PEPCK enzyme activity assay**

657

658 PEPCK enzyme activity was measured using the method of Walker et al. (1999) detailed on  
659 protocols.org (Osorio et al., 2014). Briefly, crude protein was extracted from 100-250mg  
660 FW of seed tissue in a buffer containing 0.5M bicine-KOH (pH 9.0), 0.2M KCl, 3mM EDTA,  
661 5% (w/v) PEG-4000, 25mM DTT, and 0.4% bovine serum albumin. The extract was

662 centrifuged for 20 minutes at 13,000 x g at 4°C, and the supernatant was added to a buffer  
663 containing 0.5M bicine-KOH (pH 9.0), 3mM EDTA, 55% (w/v) PEG-4000, and 25mM DTT,  
664 then incubated for 10 minutes on ice and centrifuged at 13,000 x g at 4°C for 20  
665 minutes. The supernatant was discarded, and the pellet was resuspended in 10mM bicine-  
666 KOH (pH 9.0) containing 25mM DTT. PEPCK activity was measured in the direction of the  
667 carboxylation reaction by coupling the reaction with malate dehydrogenase (EC 1.1.1.37;  
668 Sigma Aldrich 10127914001) and following the oxidation of NADH at 340nm at room  
669 temperature using a spectrophotometer (SpectraMax M2<sup>e</sup>, Molecular Devices ). Total  
670 protein was measured using the protein extract for PEPCK activity using Bradford reagent  
671 (Millipore Sigma; Cat: B6916) and a standard curve using commercial bovine serum  
672 albumin standards (Thermo Fisher, cat: 23208).

673

674 **Supplementary material:**

675

676 **Supplementary data 1:** Establishing and assessing short time pulse labeling conditions  
677 for non-perturbed *in planta* temporal assessment of seed development

678 **Supplementary Figure S1:** <sup>13</sup>C<sub>6</sub> glucose labeling using cotyledons of R7 seeds for  
679 establishing the culturing system.

680 **Supplementary Table S1:** Composition of seed coat exudate, quantities represented in  
681 nmol per seed

682 **Supplementary Table S2:** Total pool size (accurate quantities) of the metabolites  
683 detected via LC-MS/MS

684 **Supplementary Table S3:** Temporal changes in carbon conversion efficiency and loss  
685 of CO<sub>2</sub> as PEPCK

686 **Supplementary Table S4:** Primers used for droplet digital PCR and their annealing  
687 temperatures

688 **Supplementary Table S5:** Amino acid concentration (mg seed<sup>-1</sup>) from hydrolyzed  
689 protein at different developmental stages

690 **Supplementary Table S6:** Biomass component measurements for soybean seed  
691 developmental stages

692 **Supplementary Table S7:** MRM parameters used for absolute quantification

693 **Supplementary Table S8:** MRM parameters used for isotope labeling experiments

694 **Supplementary Table S9:** Calculations for isotopologue distribution and average  
695 labeling

696

697 **Acknowledgements:** The authors would like to thank the director of proteomics and mass  
698 spectrometry (PMSF) facility at the Donald Danforth Plant Science Center (DDPSC), Dr.  
699 Bradley S. Evans for his support and advice throughout this work. In addition, the authors  
700 acknowledge the Plant Growth Facility (PGF) at DDPSC for their help with plant growth and  
701 maintenance. The authors declare no conflicts of interest.

702

703 **Figure Legends:**

704

705 **Figure 1: Description of temporal changes in metabolite content over seed**  
706 **development:**

707 A. Representation of the increasing accumulation of inactive/inert pools that constitute  
708 key storage reserves over the course of development (R5-R8) diluting the active  
709 metabolite pool. Decrease in active metabolite content as a percent of biomass (dry

710 weight basis) by developmental stage B. Trend of the active metabolite content as  
711 evaluated on a “per gram dry weight” basis C. Trend in the active metabolite content as  
712 evaluated on a “per seed dry weight” basis.

713

714 **Figure 2: Soybean seed developmental stage descriptions:**

715 A. Image of representative cotyledons excised from the seed coat used for analyses  
716 from R5 (seed filling stage) – R8 (maturity). B. Fresh weight (FW) and dry weight (DW)  
717 measurements of cotyledon pairs represented as  $\text{mg seed}^{-1}$ , with moisture content  
718 calculated as loss of water from cotyledons upon drying, are represented in  
719 percentages. Error bars represent standard errors of mean,  $n = 6$ . C. Net  $\text{CO}_2$  released  
720 is presented in  $\mu\text{g seed}^{-1} \text{min}^{-1}$ , error bars represent standard errors of mean,  $n = 6$   
721 where each of the replicates represents an average of 10 measurements for a single  
722 cotyledon to overcome instrument drift.

723

724 **Figure 3: Trends in biomass component accumulation during seed development:**

725 Levels of individual biomass components were quantified as described in the ‘Materials  
726 and Methods’ section on a mg per seed basis. Values are based on cotyledons and do  
727 not include seed coat except for R8. \*Dietary fiber and ash were calculated by  
728 subtracting all other components from total seed biomass. Error bars represent  
729 standard error of mean ( $n = 3$ ).

730

731 **Figure 4: Levels of quantifiable metabolites in the exudate of developing seeds.**



732 Three metabolite classes: amino acids (purple), sugars (blue), and organic acids  
733 (green) were quantified and presented as nmol per seed amounts. Amino acids  
734 represented a major supply in R5 before decreasing significantly (by ~60%) at R5.5.  
735 The supply of sugars remained relatively consistent between R5 and R6 and decreased  
736 considerably by the time seeds reached the maturation phase (R7). Of the measured  
737 metabolites, asparagine (Asn), glutamine (Gln), histidine (His), sucrose (Sucr), malate  
738 (Mal) and succinate (Suc) were present in abundance at all stages.

739

740 **Figure 5: *k*-means clustering using central carbon and nitrogen metabolism**  
741 **intermediates representing trends over seed development stages (R5-R8).**

742 A total of 47 metabolites that include central carbon intermediates, organic and amino  
743 acids as well as sugars were used for clustering. Metabolite levels were first calculated  
744 as nmol seed<sup>-1</sup> (Supplementary table S2). For the clustering analysis, each metabolite  
745 was normalized using its maximum value at any stage (which was given a value of 1) in  
746 order to enable comparison of trends over the course of seed development. The optimal  
747 number of clusters was determined using the elbow method and was set at  $k = 5$ , as the  
748 within-cluster sum of squared distances reduced past 5 clusters. Metabolites that  
749 clustered together were represented on a two-dimensional space using PCA (left panel)  
750 and the trends over development for each cluster were presented on the right panel.  
751 Abbreviations are defined in Supplementary Table S2.

752

753 **Figure 6: Carbon from turned over lipids is used to make hexose phosphates**  
754 **during R7.**

755 A.  $^{13}\text{C}$  enrichment in intermediates of gluconeogenesis within a 30 min time course pulse  
756 labeling experiment using  $^{13}\text{C}_3$  glycerol. B. Phosphoenolpyruvate carboxykinase  
757 (PEPCK) activity, as a signature of gluconeogenesis, over the course of seed  
758 development. C. Schematic representation of carbon movement at R7 through central  
759 carbon metabolism involved in shuttling carbon from degrading lipids toward  
760 carbohydrate metabolism. Intermediates of gluconeogenic and carbohydrate  
761 metabolism that were labeled by  $^{13}\text{C}_3$  glycerol are highlighted in red. Abbreviations:  
762 G6P, Glucose 6-phosphate; G1P, Glucose 1-phosphate; DHAP, Dihydroxyacetone  
763 phosphate; GAP, Glyceraldehyde 3-phosphate; UDPG: Uridine diphosphate glucose;  
764 PGA, 3-phospho glyceric acid; PEP, Phosphoenoyl pyruvate; PEPCK, Phosphoenol  
765 pyruvate carboxykinase; OAA, Oxaloacetic acid; Mal, Malic acid; FA, Fatty acids; ER,  
766 Endoplasmic reticulum; CWP, Cell wall polysaccharides.

767

768 **Figure 7:  $^{13}\text{C}_{12}$  Sucrose labeling in seed coats of R7 seeds.**

769 A. Depiction of R7 pod with an expanded view of seed coat and cotyledon. Seed coats  
770 were excised and cultured with  $^{13}\text{C}_{12}$  sucrose as a sole source of carbon (see methods  
771 for description) over 30 minutes. B. Biochemical route for  $^{13}\text{C}_{12}$  sucrose incorporation for  
772 raffinose biosynthesis. Sucrose is used for the production of glucose 6-phosphate (G6P)  
773 followed by myo-inositol. G6P enters carbohydrate metabolism to produce uridine  
774 diphosphate glucose (UDPG). UDPG and myo-inositol together produce galactinol  
775 which is combined with sucrose to produce raffinose via *raffinose synthase (RS)*. C. A  
776 30 minute pulse labeling experiment using seed coats of the soybean line 'Jack' and a  
777 near isogenic ultra-low RFO line, Jack *rs2 rs3* (Hagely et al., 2020) at the initiation of

778 maturation stage (R7) incubated with  $^{13}\text{C}_{12}$  sucrose indicated significant label  
779 enrichment in raffinose. Y-axis represents arbitrary values normalized for pool size  
780 comparisons (see Supplementary Table S9) due to significantly different pool sizes of  
781 raffinose allowing for direct comparison of label ( $^{13}\text{C}$ ) enrichment between the two  
782 genotypes. Error bars represent standard error of mean ( $n= 3$ ).

783

784 **Figure 8: Proposed model for metabolic switch between R6 and R7 to shuttle**  
785 **carbon from starch and lipid breakdown to oligosaccharide and cell wall**  
786 **polysaccharide biosynthesis.**

787 As described in text, sources of carbon in R6 used for reserve production and energy  
788 metabolism are not present late in development and result in some storage reserves  
789 being turned over to support biosynthesis of others. Abbreviations: G6P, glucose 6-  
790 phosphate; G1P, glucose 1-phosphate; UDPG, uridine diphosphate glucose; TP, triose  
791 phosphate; PEP, phosphoenol pyruvate; PYR, pyruvate; ACP, acyl carrier protein; OAA,  
792 oxaloacetic acid; 2OG, 2-oxoglutarate; RFO, raffinose family oligosaccharides; CWP,  
793 cell wall polysaccharides; TCA, tricarboxylic acid; GLYOX, glyoxylate; ICIT, isocitrate.

794

795 References

796

797 **Adams CA, Fjerstad MC, Rinne RW** (1983) Characteristics of Soybean Seed  
798 Maturation: Necessity for Slow Dehydration. *Crop Science* **23**: 265-267

799 **Allen DK** (2016) Quantifying plant phenotypes with isotopic labeling & metabolic flux  
800 analysis. *Current Opinion in Biotechnology* **37**: 45-52

801 **Allen DK, Bates PD, Tjellström H** (2015) Tracking the metabolic pulse of plant lipid  
802 production with isotopic labeling and flux analyses: Past, present and future.  
803 *Progress in Lipid Research* **58**: 97-120

804 **Allen DK, Ohlrogge JB, Shachar-Hill Y** (2009) The role of light in soybean seed filling  
805 metabolism. *The Plant Journal* **58**: 220-234

- 806 **Allen DK, Young JD** (2013) Carbon and Nitrogen Provisions Alter the Metabolic Flux in  
807 Developing Soybean Embryos. *Plant Physiology* **161**: 1458-1475
- 808 **Alonso AP, Goffman FD, Ohlrogge JB, Shachar-Hill Y** (2007) Carbon conversion  
809 efficiency and central metabolic fluxes in developing sunflower (*Helianthus*  
810 *annuus* L.) embryos. *The Plant Journal* **52**: 296-308
- 811 **Angelovici R, Galili G, Fernie AR, Fait A** (2010) Seed desiccation: a bridge between  
812 maturation and germination. *Trends in Plant Science* **15**: 211-218
- 813 **Assefa Y, Bajjalieh N, Archontoulis S, Casteel S, Davidson D, Kovács P, Naeve S,**  
814 **Ciampitti IA** (2018) Spatial Characterization of Soybean Yield and Quality  
815 (Amino Acids, Oil, and Protein) for United States. *Scientific Reports* **8**: 14653
- 816 **Bates P, Browse J** (2012) The Significance of Different Diacylglycerol Synthesis  
817 Pathways on Plant Oil Composition and Bioengineering. *Frontiers in Plant*  
818 *Science* **3**
- 819 **Baud S, Boutin J-P, Miquel M, Lepiniec L, Rochat C** (2002) An integrated overview  
820 of seed development in *Arabidopsis thaliana* ecotype WS. *Plant Physiology and*  
821 *Biochemistry* **40**: 151-160
- 822 **Baud S, Graham IA** (2006) A spatiotemporal analysis of enzymatic activities associated  
823 with carbon metabolism in wild-type and mutant embryos of *Arabidopsis* using in  
824 situ histochemistry. *The Plant Journal* **46**: 155-169
- 825 **Baud S, Lepiniec L** (2009) Regulation of de novo fatty acid synthesis in maturing  
826 oilseeds of *Arabidopsis*. *Plant Physiology and Biochemistry* **47**: 448-455
- 827 **Baud S, Wuillème S, To A, Rochat C, Lepiniec L** (2009) Role of WRINKLED1 in the  
828 transcriptional regulation of glycolytic and fatty acid biosynthetic genes in  
829 *Arabidopsis*. *The Plant Journal* **60**: 933-947
- 830 **Borisjuk L, Nguyen TH, Neuberger T, Rutten T, Tschiersch H, Claus B, Feussner I,**  
831 **Webb AG, Jakob P, Weber H, Wobus U, Rolletschek H** (2005) Gradients of  
832 lipid storage, photosynthesis and plastid differentiation in developing soybean  
833 seeds. *New Phytologist* **167**: 761-776
- 834 **Buescher JM, Antoniewicz MR, Boros LG, Burgess SC, Brunengraber H, Clish CB,**  
835 **DeBerardinis RJ, Feron O, Frezza C, Ghesquiere B, Gottlieb E, Hiller K,**  
836 **Jones RG, Kamphorst JJ, Kibbey RG, Kimmelman AC, Locasale JW, Lunt**  
837 **SY, Maddocks ODK, Malloy C, Metallo CM, Meuillet EJ, Munger J, Nöh K,**  
838 **Rabinowitz JD, Ralser M, Sauer U, Stephanopoulos G, St-Pierre J, Tennant**  
839 **DA, Wittmann C, Vander Heiden MG, Vazquez A, Vousden K, Young JD,**  
840 **Zamboni N, Fendt S-M** (2015) A roadmap for interpreting <sup>13</sup>C metabolite  
841 labeling patterns from cells. *Current Opinion in Biotechnology* **34**: 189-201
- 842 **Chapman KD, Dyer JM, Mullen RT** (2012) Biogenesis and functions of lipid droplets in  
843 plants: Thematic Review Series: Lipid Droplet Synthesis and Metabolism: from  
844 Yeast to Man. *Journal of Lipid Research* **53**: 215-226
- 845 **Chia TYP, Pike MJ, Rawsthorne S** (2005) Storage oil breakdown during embryo  
846 development of *Brassica napus* (L.). *Journal of Experimental Botany* **56**: 1285-  
847 1296
- 848 **Clemente TE, Cahoon EB** (2009) Soybean Oil: Genetic Approaches for Modification of  
849 Functionality and Total Content. *Plant Physiology* **151**: 1030-1040

- 850 **Collakova E, Aghamirzaie D, Fang Y, Klumas C, Tabataba F, Kakumanu A, Myers**  
851 **E, Heath LS, Grene R** (2013) Metabolic and Transcriptional Reprogramming in  
852 Developing Soybean (*Glycine max*) Embryos. *Metabolites* **3**: 347-372
- 853 **Czajka JJ, Kambhampati S, Tang YJ, Wang Y, Allen DK** (2020) Application of Stable  
854 Isotope Tracing to Elucidate Metabolic Dynamics During *Yarrowia lipolytica*  $\alpha$ -  
855 Ionone Fermentation. *iScience* **23**: 100854
- 856 **Dierking EC, Bilyeu KD** (2009) Raffinose and stachyose metabolism are not required  
857 for efficient soybean seed germination. *Journal of Plant Physiology* **166**: 1329-  
858 1335
- 859 **Dyer JM, Stymne S, Green AG, Carlsson AS** (2008) High-value oils from plants. *The*  
860 *Plant Journal* **54**: 640-655
- 861 **Eastmond PJ, Germain V, Lange PR, Bryce JH, Smith SM, Graham IA** (2000)  
862 Postgerminative growth and lipid catabolism in oilseeds lacking the glyoxylate  
863 cycle. *Proceedings of the National Academy of Sciences* **97**: 5669-5674
- 864 **Eastmond PJ, Graham IA** (2001) Re-examining the role of the glyoxylate cycle in  
865 oilseeds. *Trends in Plant Science* **6**: 72-78
- 866 **Egli DB, Bruening WP** (2001) Source-sink Relationships, Seed Sucrose Levels and  
867 Seed Growth Rates in Soybean. *Annals of Botany* **88**: 235-242
- 868 **Fabre F, Planchon C** (2000) Nitrogen nutrition, yield and protein content in soybean.  
869 *Plant Science* **152**: 51-58
- 870 **Fait A, Angelovici R, Less H, Ohad I, Urbanczyk-Wochniak E, Fernie AR, Galili G**  
871 (2006) Arabidopsis Seed Development and Germination Is Associated with  
872 Temporally Distinct Metabolic Switches. *Plant Physiology* **142**: 839-854
- 873 **Gawłowska M, Święcicki W, Lahuta L, Kaczmarek Z** (2017) Raffinose family  
874 oligosaccharides in seeds of *Pisum* wild taxa, type lines for seed genes,  
875 domesticated and advanced breeding materials. *Genetic Resources and Crop*  
876 *Evolution* **64**: 569-578
- 877 **Gifford RM, John HT** (1985) Sucrose Concentration at the Apoplastic Interface  
878 between Seed Coat and Cotyledons of Developing Soybean Seeds. *Plant*  
879 *Physiology* **77**: 863-868
- 880 **Gomes CI, Obendorf RL, Horbowicz M** (2005) myo-Inositol, D-chiro-Inositol, and D-  
881 Pinitol Synthesis, Transport, and Galactoside Formation in Soybean Explants.  
882 *Crop Science* **45**: 1312-1319
- 883 **Hagely KB, Jo H, Kim J-H, Hudson KA, Bilyeu K** (2020) Molecular-assisted breeding  
884 for improved carbohydrate profiles in soybean seed. *Theoretical and Applied*  
885 *Genetics* **133**: 1189-1200
- 886 **Hagely KB, Palmquist D, Bilyeu KD** (2013) Classification of Distinct Seed  
887 Carbohydrate Profiles in Soybean. *Journal of Agricultural and Food Chemistry*  
888 **61**: 1105-1111
- 889 **Heinrich P, Kohler C, Ellmann L, Kuerner P, Spang R, Oefner PJ, Dettmer K** (2018)  
890 Correcting for natural isotope abundance and tracer impurity in MS-, MS/MS- and  
891 high-resolution-multiple-tracer-data from stable isotope labeling experiments with  
892 IsoCorrectoR. *Scientific Reports* **8**: 17910
- 893 **Hernández-Sebastià C, Marsolais F, Saravitz C, Israel D, Dewey RE, Huber SC**  
894 (2005) Free amino acid profiles suggest a possible role for asparagine in the

- 895 control of storage-product accumulation in developing seeds of low- and high-  
896 protein soybean lines. *Journal of Experimental Botany* **56**: 1951-1963
- 897 **Hsu FC, Bennett AB, Spanswick RM** (1984) Concentrations of Sucrose and  
898 Nitrogenous Compounds in the Apoplast of Developing Soybean Seed Coats  
899 and Embryos. *Plant Physiology* **75**: 181-186
- 900 **Hsu FC, Obendorf RL** (1982) Compositional analysis of in vitro matured soybean  
901 seeds. *Plant Science Letters* **27**: 129-135
- 902 **Hu R, Fan C, Li H, Zhang Q, Fu Y-F** (2009) Evaluation of putative reference genes for  
903 gene expression normalization in soybean by quantitative real-time RT-PCR.  
904 *BMC Molecular Biology* **10**: 93
- 905 **Kambhampati S, Aznar-Moreno JA, Hostetler C, Caso T, Bailey SR, Hubbard AH,**  
906 **Durrett TP, Allen DK** (2019) On the Inverse Correlation of Protein and Oil:  
907 Examining the Effects of Altered Central Carbon Metabolism on Seed  
908 Composition Using Soybean Fast Neutron Mutants. *Metabolites* **10**: 18
- 909 **Kambhampati S, Kurepin LV, Kisiala AB, Bruce KE, Cober ER, Morrison MJ,**  
910 **Emery RJN** (2017) Yield associated traits correlate with cytokinin profiles in  
911 developing pods and seeds of field-grown soybean cultivars. *Field Crops*  
912 *Research* **214**: 175-184
- 913 **Kambhampati S, Li J, Evans BS, Allen DK** (2019) Accurate and efficient amino acid  
914 analysis for protein quantification using hydrophilic interaction chromatography  
915 coupled tandem mass spectrometry. *Plant Methods* **15**: 46
- 916 **Kanai M, Yamada T, Hayashi M, Mano S, Nishimura M** (2019) Soybean (*Glycine max*  
917 *L.*) triacylglycerol lipase GmSDP1 regulates the quality and quantity of seed oil.  
918 *Scientific Reports* **9**: 8924
- 919 **Kappelmann J, Klein B, Geilenkirchen P, Noack S** (2017) Comprehensive and  
920 accurate tracking of carbon origin of LC-tandem mass spectrometry collisional  
921 fragments for <sup>13</sup>C-MFA. *Analytical and Bioanalytical Chemistry* **409**: 2309-2326
- 922 **Kosina SM, Castillo A, Schnebly SR, Obendorf RL** (2009) Soybean seed coat cup  
923 unloading on plants with low-raffinose, low-stachyose seeds. *Seed Science*  
924 *Research* **19**: 145-153
- 925 **Kuo TM, VanMiddlesworth JF, Wolf WJ** (1988) Content of raffinose oligosaccharides  
926 and sucrose in various plant seeds. *Journal of Agricultural and Food Chemistry*  
927 **36**: 32-36
- 928 **Leprince O, Pellizzaro A, Berriri S, Buitink J** (2016) Late seed maturation: drying  
929 without dying. *Journal of Experimental Botany* **68**: 827-841
- 930 **Li L, Hur M, Lee J-Y, Zhou W, Song Z, Ransom N, Demirkale CY, Nettleton D,**  
931 **Westgate M, Arendsee Z, Iyer V, Shanks J, Nikolau B, Wurtele ES** (2015) A  
932 systems biology approach toward understanding seed composition in soybean.  
933 *BMC Genomics* **16**: S9
- 934 **Licht M** (2014) Soybean Growth and Development. *In*, Vol 2019, Iowa State University  
935 Extension and Outreach
- 936 **Lin W, Oliver DJ** (2008) Role of triacylglycerols in leaves. *Plant Science* **175**: 233-237
- 937 **McCleary BV, Charmier LMJ, McKie VA** (2019) Measurement of Starch: Critical  
938 Evaluation of Current Methodology. *Starch - Stärke* **71**: 1800146

- 939 **McCleary BV, Gibson TS, Mugford DC, Collaborators** (1997) Measurement of Total  
940 Starch in Cereal Products by Amyloglucosidase- $\alpha$ -Amylase Method:  
941 Collaborative Study. *Journal of AOAC INTERNATIONAL* **80**: 571-579
- 942 **Mello Filho OLd, Sediyaama CS, Moreira MA, Reis MS, Massoni GA, Piovesan ND**  
943 (2004) Grain yield and seed quality of soybean selected for high protein content.  
944 *Pesquisa Agropecuária Brasileira* **39**: 445-450
- 945 **Naeve SL** (2005) Soybean growth stages. *In*, Vol 2019, University of Minnesota  
946 Extension
- 947 **O'Grady J, Schwender J, Shachar-Hill Y, Morgan JA** (2012) Metabolic cartography:  
948 experimental quantification of metabolic fluxes from isotopic labelling studies.  
949 *Journal of Experimental Botany* **63**: 2293-2308
- 950 **Osorio S, Vallarino JG, Szecowka M, Ufaz S, Tzin V, Angelovici R, Galili G, Aarabi**  
951 **F** (2014) Extraction and Measurement the Activities of Cytosolic  
952 Phosphoenolpyruvate Carboxykinase (PEPCK) and Plastidic NADP-dependent  
953 Malic Enzyme (ME) on Tomato (*Solanum lycopersicum*). *Bio-protocol* **4**: e1122
- 954 **Patil G, Mian R, Vuong T, Pantalone V, Song Q, Chen P, Shannon GJ, Carter TC,**  
955 **Nguyen HT** (2017) Molecular mapping and genomics of soybean seed protein: a  
956 review and perspective for the future. *Theoretical and Applied Genetics* **130**:  
957 1975-1991
- 958 **Pipolo AE, Sinclair TR, Camara GMS** (2004) Protein and oil concentration of soybean  
959 seed cultured in vitro using nutrient solutions of differing glutamine concentration.  
960 *Annals of Applied Biology* **144**: 223-227
- 961 **Quoc Thien N, Anna K, Peter A, Emery RJN, Suresh N** (2016) Soybean Seed  
962 Development: Fatty Acid and Phytohormone Metabolism and Their Interactions.  
963 *Current Genomics* **17**: 241-260
- 964 **Rainbird RM, Thorne JH, Hardy RWF** (1984) Role of Amides, Amino Acids, and  
965 Ureides in the Nutrition of Developing Soybean Seeds. *Plant Physiology* **74**: 329-  
966 334
- 967 **Raymond R, Spiteri A, Dieuaide M, Gerhardt B, Pradet A** (1992) Peroxisomal beta -  
968 oxidation of fatty acids and citrate formation by a particulate fraction from early  
969 germinating sunflower seeds. **30**: 153-161
- 970 **Rolletschek H, Radchuk R, Klukas C, Schreiber F, Wobus U, Borisjuk L** (2005)  
971 Evidence of a key role for photosynthetic oxygen release in oil storage in  
972 developing soybean seeds. *New Phytologist* **167**: 777-786
- 973 **Rolletschek H, Schwender J, Konig C, Chapman KD, Romsdahl T, Lorenz C,**  
974 **Braun HP, Denolf P, Van Audenhove K, Munz E, Heinzl N, Ortleb S, Rutten**  
975 **T, McCorkle S, Borysyuk T, Guendel A, Shi H, Vander Auwermeulen M,**  
976 **Bourot S, Borisjuk L** (2020) Cellular Plasticity in Response to Suppression of  
977 Storage Proteins in the Brassica napus Embryo. *Plant Cell* **32**: 2383-2401
- 978 **Rolletschek H, Weber H, Borisjuk L** (2003) Energy Status and Its Control on  
979 Embryogenesis of Legumes. Embryo Photosynthesis Contributes to Oxygen  
980 Supply and Is Coupled to Biosynthetic Fluxes. *Plant Physiology* **132**: 1196-1206
- 981 **Ruuska SA, Schwender J, Ohlrogge JB** (2004) The Capacity of Green Oilseeds to  
982 Utilize Photosynthesis to Drive Biosynthetic Processes. *Plant Physiology* **136**:  
983 2700-2709

- 984 **Salon C, Raymond P, Pradet A** (1988) Quantification of carbon fluxes through the  
985 tricarboxylic acid cycle in early germinating lettuce embryos. *Journal of Biological*  
986 *Chemistry* **263**: 12278-12287
- 987 **Sánchez-Mata MC, Peñuela-Teruel MJ, Cámara-Hurtado M, Díez-Marqués C,**  
988 **Torija-Isasa ME** (1998) Determination of Mono-, Di-, and Oligosaccharides in  
989 Legumes by High-Performance Liquid Chromatography Using an Amino-Bonded  
990 Silica Column. *Journal of Agricultural and Food Chemistry* **46**: 3648-3652
- 991 **Schillinger JA DE, Bilyeu KD** (2013) Soybeans having high germination rates and  
992 ultra-low raffinose and stachyose content. *In* USPTO, ed, Vol 8471107, USA
- 993 **Schillinger JA DE, Bilyeu KD** (2018) Soybeans having high germination rates and  
994 ultra-low raffinose and stachyose content. *In* USPTO, ed, Vol 10081814, USA
- 995 **Schwender J, Goffman F, Ohlrogge JB, Shachar-Hill Y** (2004) Rubisco without the  
996 Calvin cycle improves the carbon efficiency of developing green seeds. *Nature*  
997 **432**: 779-782
- 998 **Schwender J, Ohlrogge JB** (2002) Probing in Vivo Metabolism by Stable Isotope  
999 Labeling of Storage Lipids and Proteins in Developing (Brassica napus)  
1000 Embryos. *Plant Physiology* **130**: 347-361
- 1001 **Schwender J, Shachar-Hill Y, Ohlrogge JB** (2006) Mitochondrial Metabolism in  
1002 Developing Embryos of Brassica napus. *Journal of Biological Chemistry* **281**:  
1003 34040-34047
- 1004 **Singh SK, Barnaby JY, Reddy VR, Sicher RC** (2016) Varying Response of the  
1005 Concentration and Yield of Soybean Seed Mineral Elements, Carbohydrates,  
1006 Organic Acids, Amino Acids, Protein, and Oil to Phosphorus Starvation and CO<sub>2</sub>  
1007 Enrichment. *Frontiers in Plant Science* **7**
- 1008 **Team RC** (2013) A language and environment for statistical computing. *In* R Foundation  
1009 for Statistical Computing, Vienna, Austria
- 1010 **Thompson JF, Madison JT, Muenster A-ME** (1977) In vitro Culture of Immature  
1011 Cotyledons of Soya Bean (*Glycine max* L. Merr.). *Annals of Botany* **41**: 29-39
- 1012 **Truong Q, Koch K, Yoon JM, Everard JD, Shanks JV** (2013) Influence of carbon to  
1013 nitrogen ratios on soybean somatic embryo (cv. Jack) growth and composition.  
1014 *Journal of Experimental Botany* **64**: 2985-2995
- 1015 **Tschiersch H, Borisjuk L, Rutten T, Rolletschek H** (2011) Gradients of seed  
1016 photosynthesis and its role for oxygen balancing. *Biosystems* **103**: 302-308
- 1017 **Valentine MF, De Tar JR, Mookkan M, Firman JD, Zhang ZJ** (2017) Silencing of  
1018 Soybean Raffinose Synthase Gene Reduced Raffinose Family Oligosaccharides  
1019 and Increased True Metabolizable Energy of Poultry Feed. *Frontiers in Plant*  
1020 *Science* **8**
- 1021 **Walker RP, Chen Z-H, Técsi LI, Famiani F, Lea PJ, Leegood RC** (1999)  
1022 Phosphoenolpyruvate carboxykinase plays a role in interactions of carbon and  
1023 nitrogen metabolism during grape seed development. *Planta* **210**: 9-18
- 1024 **Wickham H** (2016) ggplot2: Elegant Graphics for Data Analysis. Springer Publishing  
1025 Company, Incorporated
- 1026



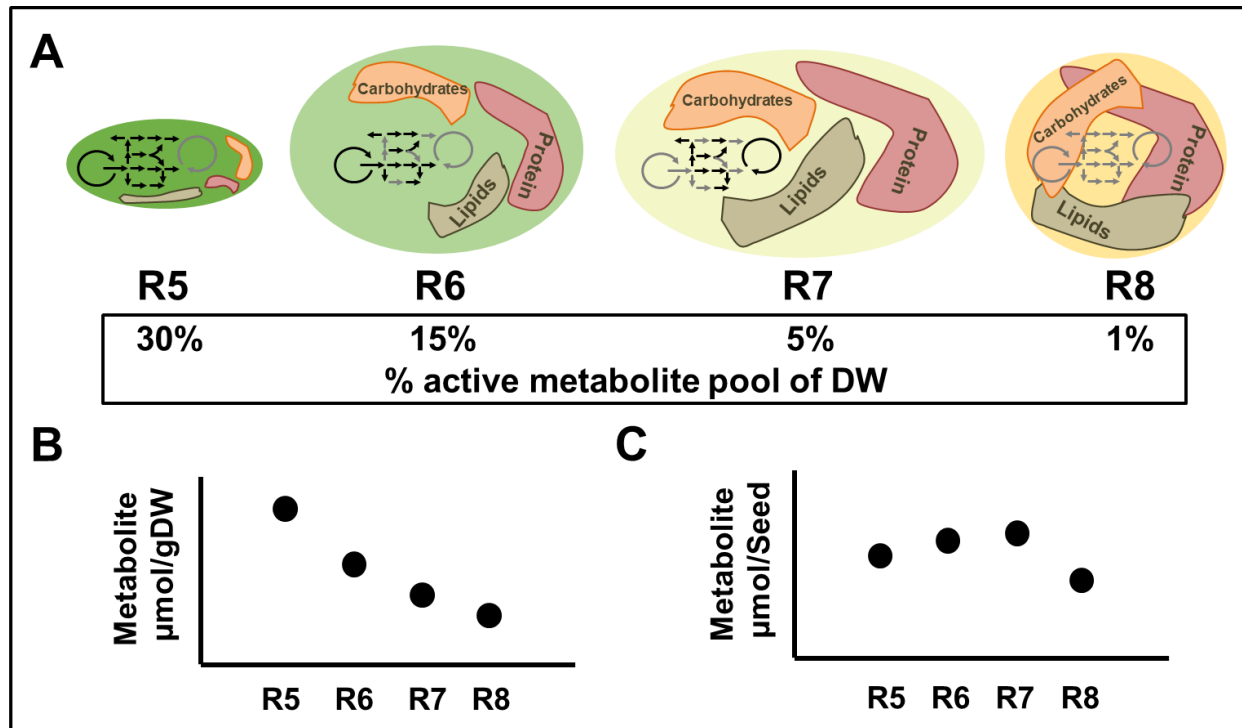

**Figure 1: Description of temporal changes in metabolite content over seed development:**

A. Representation of the increasing accumulation of inactive/inert pools that constitute key storage reserves over the course of development (R5-R8) diluting the active metabolite pool. Decrease in active metabolite content as a percent of biomass (dry weight basis) by developmental stage B. Trend of the active metabolite content as evaluated on a “per gram dry weight” basis C. Trend in the active metabolite content as evaluated on a “per seed dry weight” basis.

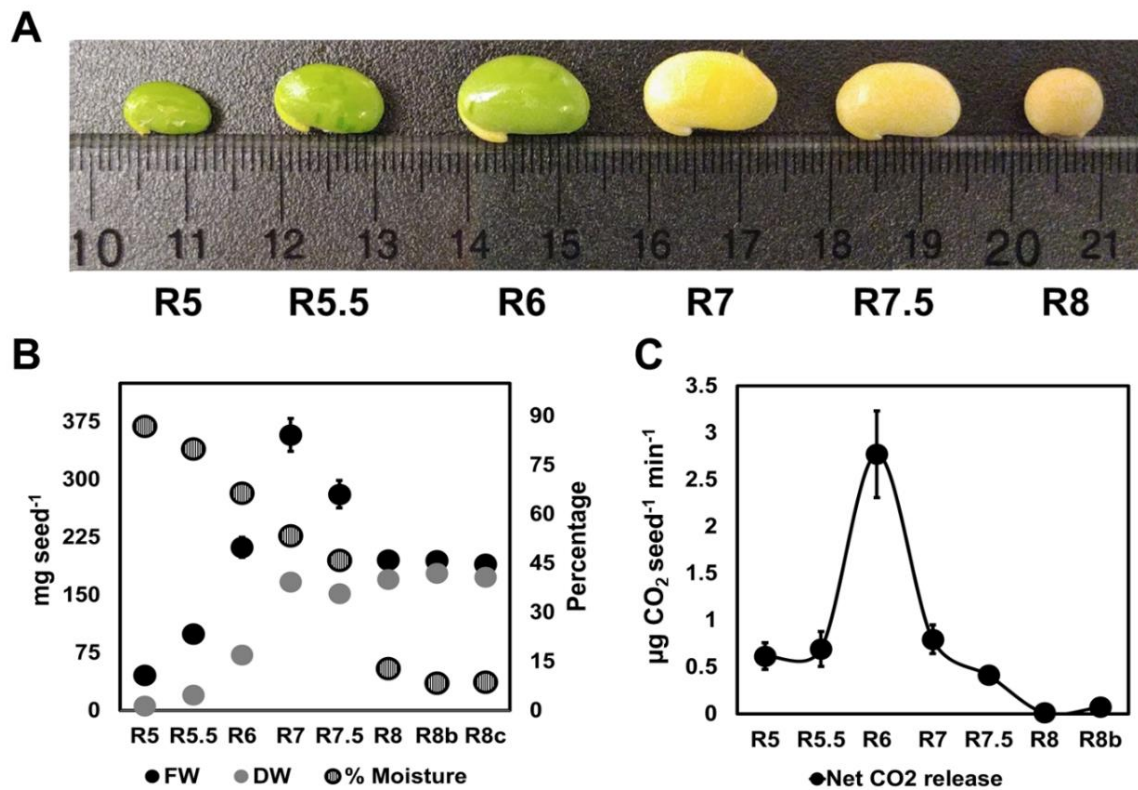

**Figure 2: Soybean seed developmental stage descriptions:**

A. Image of representative cotyledons excised from the seed coat used for analyses from R5 (seed filling stage) – R8 (maturity). B. Fresh weight (FW) and dry weight (DW) measurements of cotyledon pairs represented as  $\text{mg seed}^{-1}$ , with moisture content calculated as loss of water from cotyledons upon drying, are represented in percentages. Error bars represent standard errors of mean,  $n = 6$ . C. Net  $\text{CO}_2$  released is presented in  $\mu\text{g seed}^{-1} \text{ min}^{-1}$ , error bars represent standard errors of mean,  $n = 6$  where each of the replicates represents an average of 10 measurements for a single cotyledon to overcome instrument drift.

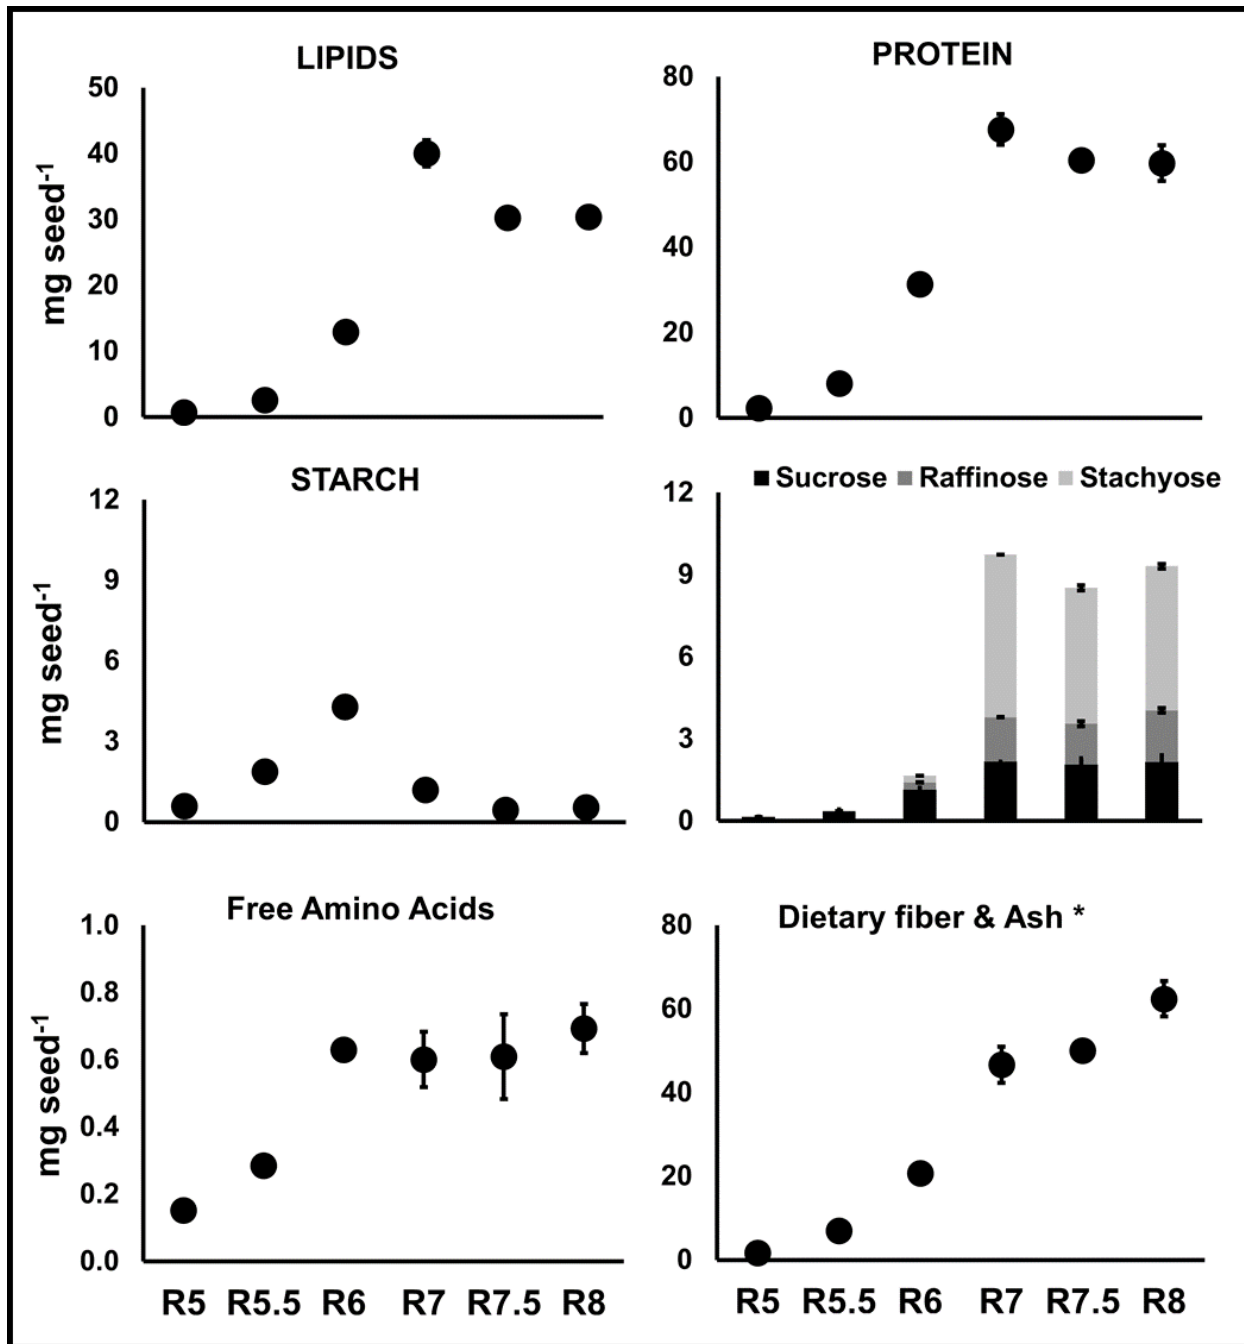

**Figure 3: Trends in biomass component accumulation during seed development:** Levels of individual biomass components were quantified as described in the ‘Materials and Methods’ section on a mg per seed basis. Values are based on cotyledons and do not include seed coat except for R8. \*Dietary fiber and ash were calculated by subtracting all other components from total seed biomass. Error bars represent standard error of mean ( $n = 3$ ).

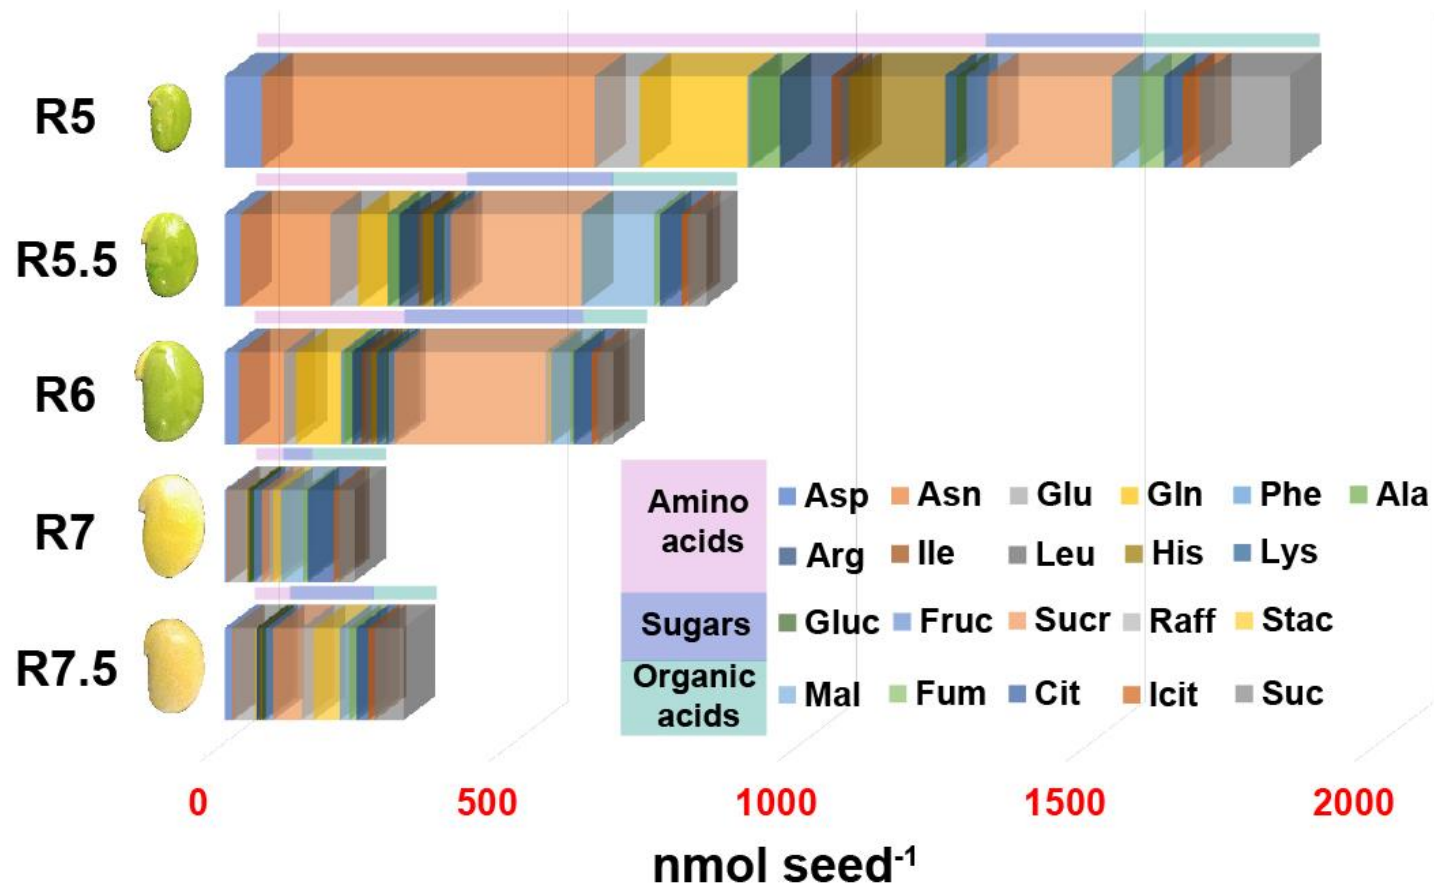

**Figure 4: Levels of quantifiable metabolites in the exudate of developing seeds.**

Three metabolite classes: amino acids (purple), sugars (blue), and organic acids (green) were quantified and presented as nmol per seed amounts. Amino acids represented a major supply in R5 before decreasing significantly (by ~60%) at R5.5. The supply of sugars remained relatively consistent between R5 and R6 and decreased considerably by the time seeds reached the maturation phase (R7). Of the measured metabolites, asparagine (Asn), glutamine (Gln), histidine (His), sucrose (Sucr), malate (Mal) and succinate (Suc) were present in abundance at all stages.

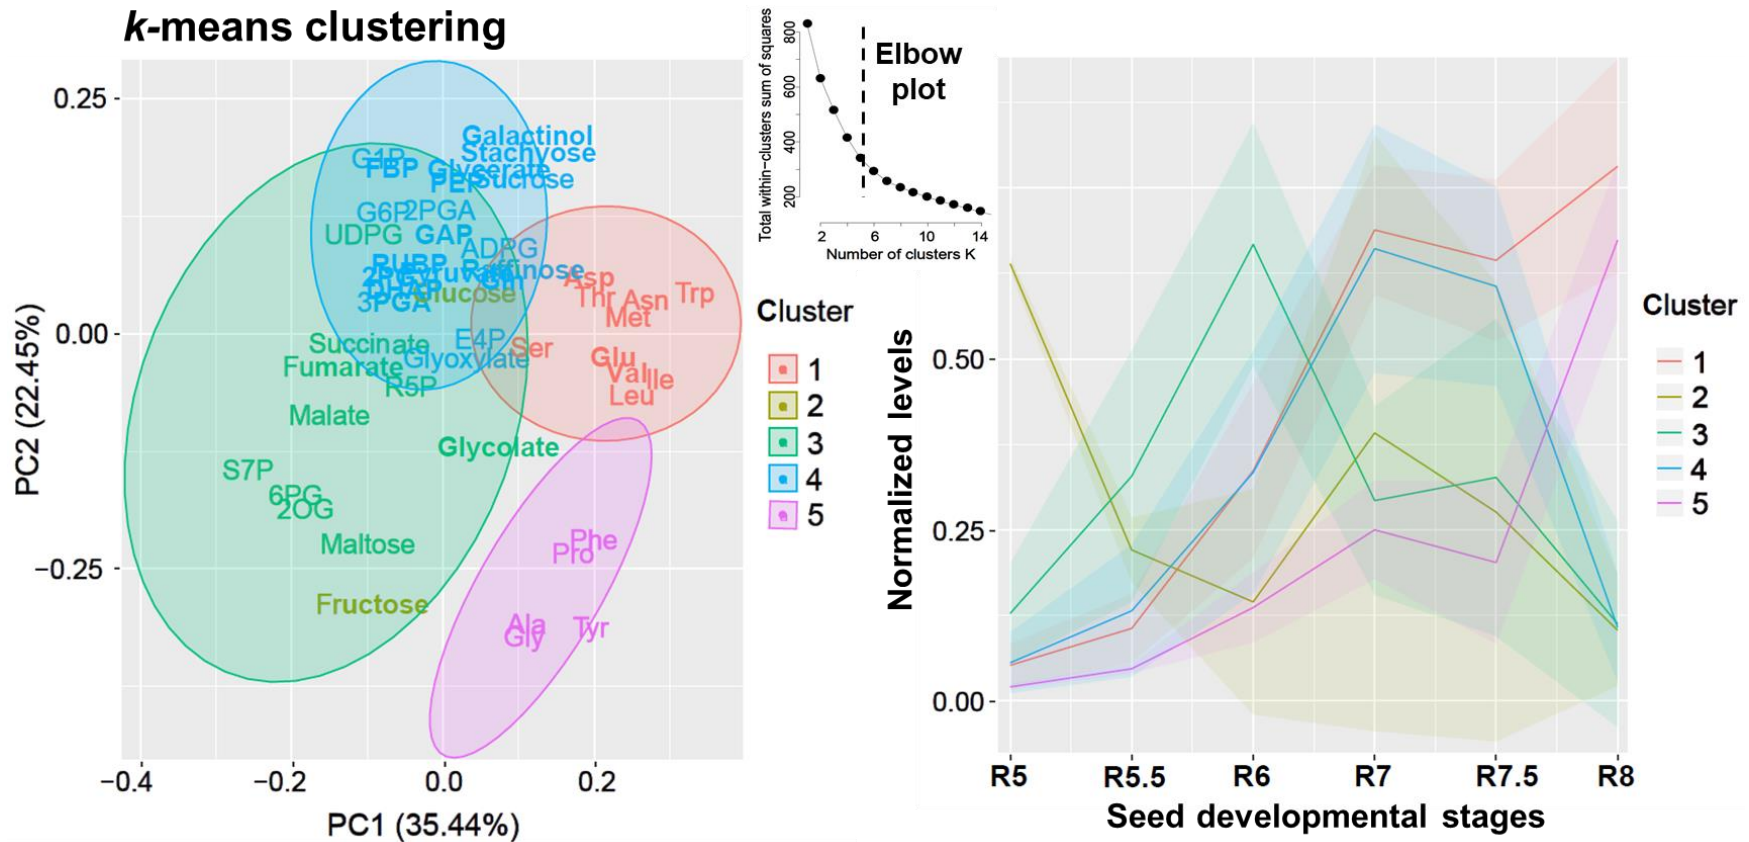

**Figure 5: k-means clustering using central carbon and nitrogen metabolism intermediates representing trends over seed development stages (R5-R8).**

A total of 47 metabolites that include central carbon intermediates, organic and amino acids as well as sugars were used for clustering. Metabolite levels were first calculated as  $\text{nmol seed}^{-1}$  (Supplementary table S2). For the clustering analysis, each metabolite was normalized using its maximum value at any stage (which was given a value of 1) in order to enable comparison of trends over the course of seed development. The optimal number of clusters was determined using the elbow method and was set at  $k = 5$ , as the within-cluster sum of squared distances reduced past 5 clusters. Metabolites that clustered together were represented on a two-dimensional space using PCA (left panel) and the trends over development for each cluster were presented on the right panel. Abbreviations are defined in Supplementary Table S2.

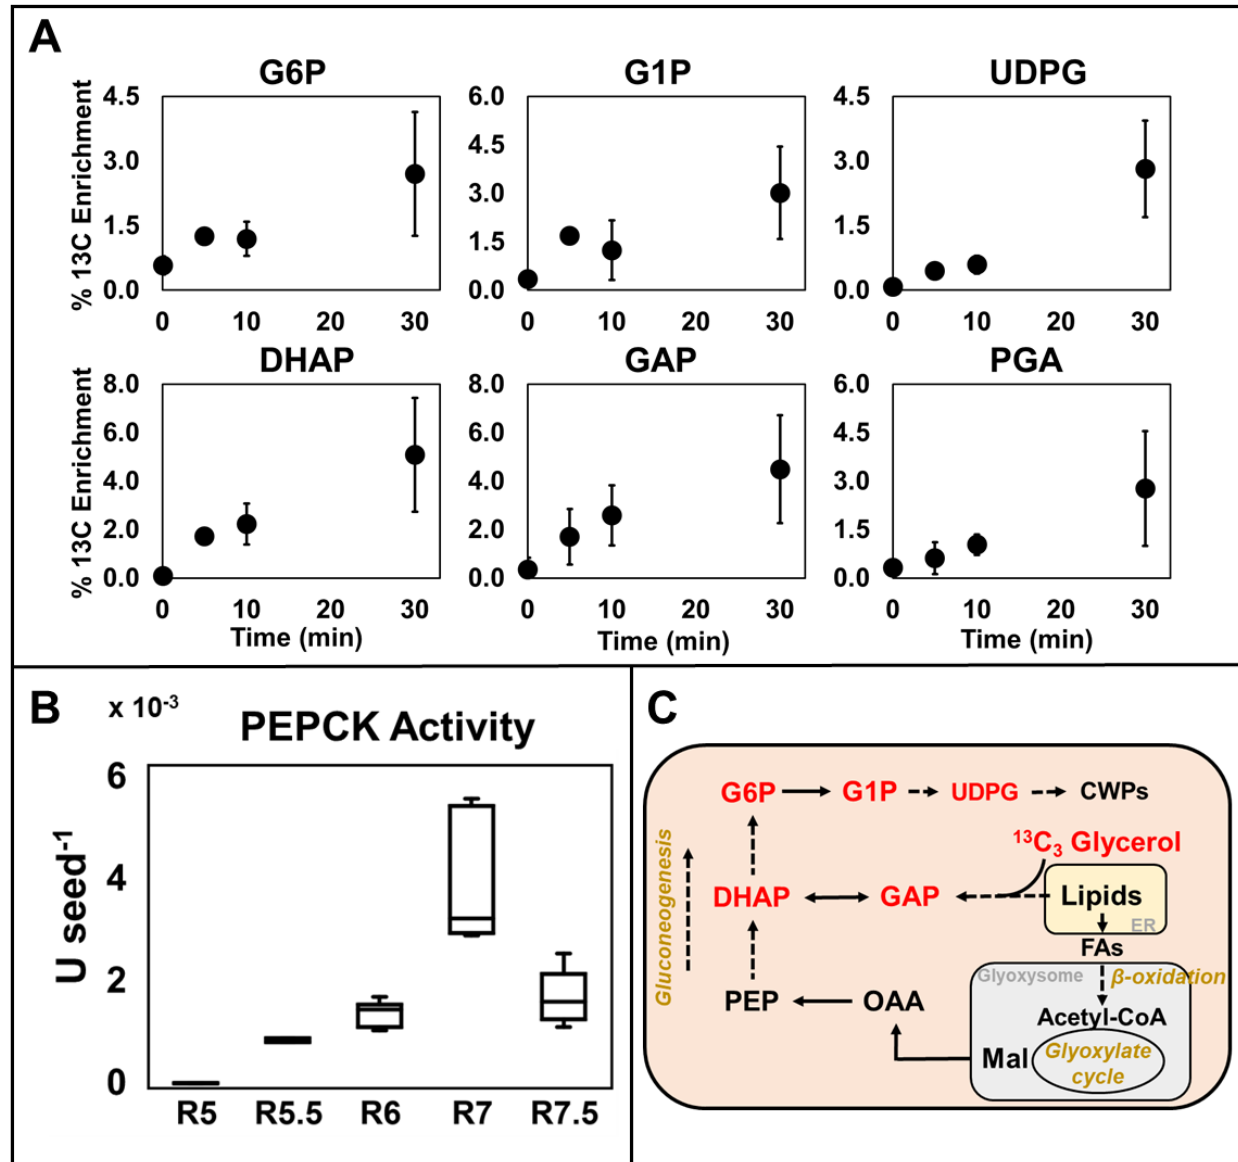

**Figure 6: Carbon from turned over lipids is used to make hexose phosphates during R7.**

A. <sup>13</sup>C enrichment (as defined in methods) in intermediates of gluconeogenesis within a 30 min time course pulse labeling experiment using <sup>13</sup>C<sub>3</sub> glycerol. B. Phosphoenolpyruvate carboxykinase (PEPCK) activity, as a signature of gluconeogenesis, over the course of seed development. C. Schematic representation of carbon movement at R7 through central carbon metabolism involved in shuttling carbon from degrading lipids toward carbohydrate metabolism. Intermediates of gluconeogenic and carbohydrate metabolism that were labeled by <sup>13</sup>C<sub>3</sub> glycerol are highlighted in red. Abbreviations: G6P, Glucose 6-phosphate; G1P, Glucose 1-phosphate; DHAP, Dihydroxyacetone phosphate; GAP, Glyceraldehyde 3-phosphate; UDPG: Uridine diphosphate glucose; PGA, 3-phospho glyceric acid; PEP, Phosphoenolpyruvate; PEPCK, Phosphoenolpyruvate carboxykinase; OAA, Oxaloacetic acid; Mal, Malic acid; FA, Fatty acids; ER, Endoplasmic reticulum; CWP, Cell wall polysaccharides.

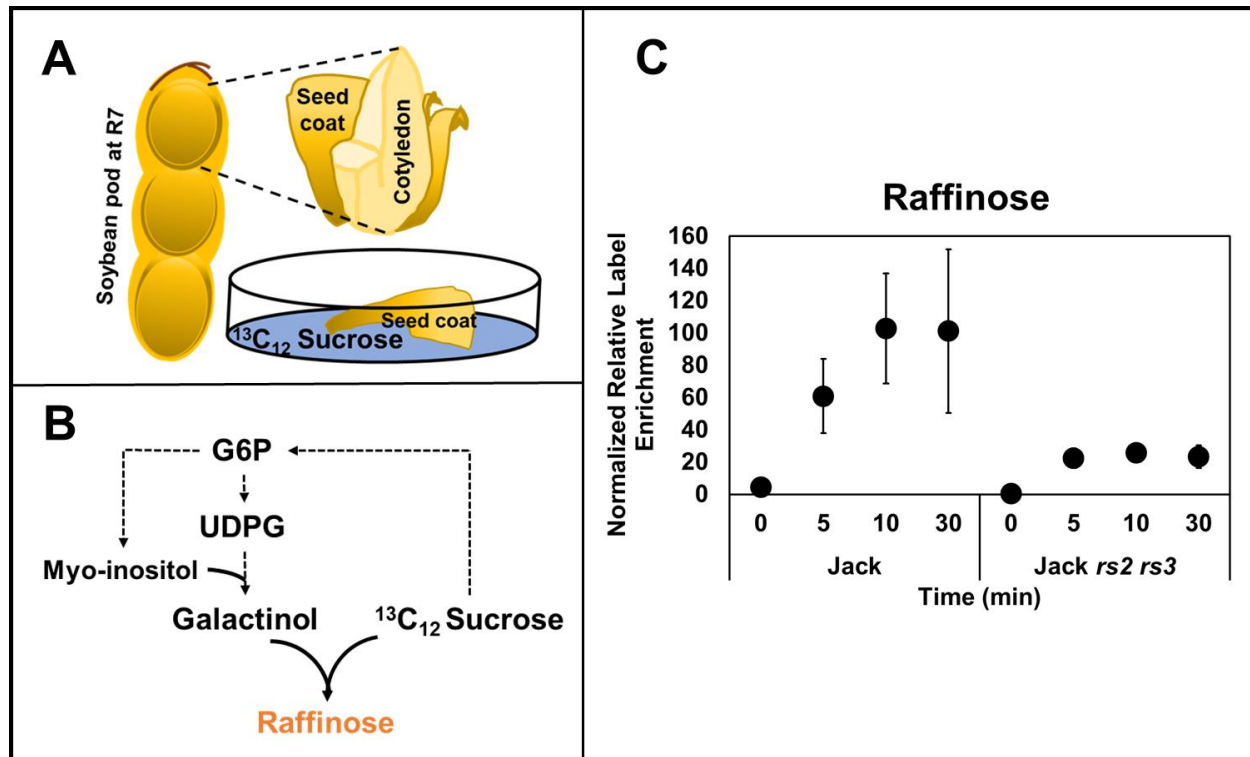

**Figure 7:  $^{13}\text{C}_{12}$  Sucrose labeling in seed coats of R7 seeds.**

A. Depiction of R7 pod with an expanded view of seed coat and cotyledon. Seed coats were excised and cultured with  $^{13}\text{C}_{12}$  sucrose as a sole source of carbon (see methods for description) over 30 minutes. B. Biochemical route for  $^{13}\text{C}_{12}$  sucrose incorporation for raffinose biosynthesis. Sucrose is used for the production of glucose 6-phosphate (G6P) followed by myo-inositol. G6P enters carbohydrate metabolism to produce uridine diphosphate glucose (UDPG). UDPG and myo-inositol together produce galactinol which is combined with sucrose to produce raffinose via *raffinose synthase* (*RS*). C. A 30 minute pulse labeling experiment using seed coats of the soybean line ‘Jack’ and a near isogenic ultra-low RFO line, Jack *rs2 rs3* (Hagely et al., 2020) at the initiation of maturation stage (R7) incubated with  $^{13}\text{C}_{12}$  sucrose indicated significant label enrichment in raffinose. Y-axis represents arbitrary values normalized for pool size comparisons (see Supplementary Table S9) due to significantly different pool sizes of raffinose allowing for direct comparison of label ( $^{13}\text{C}$ ) enrichment between the two genotypes. Error bars represent standard error of mean ( $n=3$ ).

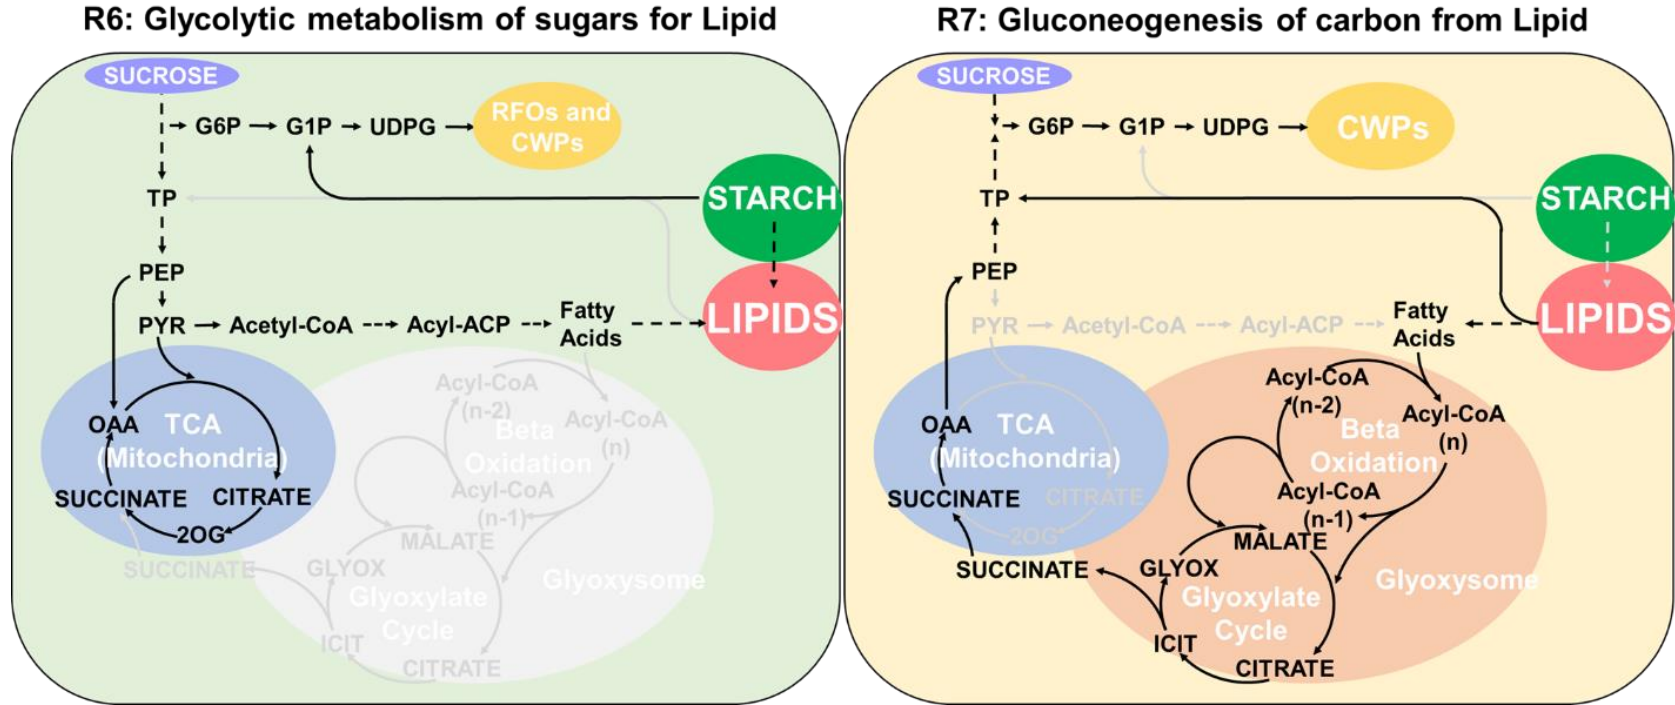

**Figure 8: Proposed model for metabolic switch between R6 and R7 to shuttle carbon from starch and lipid breakdown to oligosaccharide and cell wall polysaccharide biosynthesis.**

As described in text, sources of carbon in R6 used for reserve production and energy metabolism are not present late in development and result in some storage reserves being turned over to support biosynthesis of others. Amino acid biosynthesis for protein not shown. Abbreviations: G6P, glucose 6-phosphate; G1P, glucose 1-phosphate; UDPG, uridine diphosphate glucose; TP, triose phosphate; PEP, phosphoenol pyruvate; PYR, pyruvate; ACP, acyl carrier protein; OAA, oxaloacetic acid; 2OG, 2-oxoglutarate; RFO, raffinose family oligosaccharides; CWP, cell wall polysaccharides; TCA, tricarboxylic acid; GLYOX, glyoxylate; ICIT, isocitrate.



## Parsed Citations

**Adams CA, Fjerstad MC, Rinne RW (1983) Characteristics of Soybean Seed Maturation: Necessity for Slow Dehydration**<sup>1</sup>. *Crop Science* 23: 265-267

Google Scholar: [Author Only](#) [Title Only](#) [Author and Title](#)

**Allen DK (2016) Quantifying plant phenotypes with isotopic labeling & metabolic flux analysis.** *Current Opinion in Biotechnology* 37: 45-52

Google Scholar: [Author Only](#) [Title Only](#) [Author and Title](#)

**Allen DK, Bates PD, Tjellström H (2015) Tracking the metabolic pulse of plant lipid production with isotopic labeling and flux analyses: Past, present and future.** *Progress in Lipid Research* 58: 97-120

Google Scholar: [Author Only](#) [Title Only](#) [Author and Title](#)

**Allen DK, Ohlrogge JB, Shachar-Hill Y (2009) The role of light in soybean seed filling metabolism.** *The Plant Journal* 58: 220-234

Google Scholar: [Author Only](#) [Title Only](#) [Author and Title](#)

**Allen DK, Young JD (2013) Carbon and Nitrogen Provisions Alter the Metabolic Flux in Developing Soybean Embryos.** *Plant Physiology* 161: 1458-1475

Google Scholar: [Author Only](#) [Title Only](#) [Author and Title](#)

**Alonso AP, Goffman FD, Ohlrogge JB, Shachar-Hill Y (2007) Carbon conversion efficiency and central metabolic fluxes in developing sunflower (*Helianthus annuus* L.) embryos.** *The Plant Journal* 52: 296-308

Google Scholar: [Author Only](#) [Title Only](#) [Author and Title](#)

**Angelovici R, Galili G, Fernie AR, Fait A (2010) Seed desiccation: a bridge between maturation and germination.** *Trends in Plant Science* 15: 211-218

Google Scholar: [Author Only](#) [Title Only](#) [Author and Title](#)

**Assefa Y, Bajjalieh N, Archontoulis S, Casteel S, Davidson D, Kovács P, Naeve S, Ciampitti IA (2018) Spatial Characterization of Soybean Yield and Quality (Amino Acids, Oil, and Protein) for United States.** *Scientific Reports* 8: 14653

Google Scholar: [Author Only](#) [Title Only](#) [Author and Title](#)

**Bates P, Browse J (2012) The Significance of Different Diacylglycerol Synthesis Pathways on Plant Oil Composition and Bioengineering.** *Frontiers in Plant Science* 3

Google Scholar: [Author Only](#) [Title Only](#) [Author and Title](#)

**Baud S, Boutin J-P, Miquel M, Lepiniec L, Rochat C (2002) An integrated overview of seed development in *Arabidopsis thaliana* ecotype WS.** *Plant Physiology and Biochemistry* 40: 151-160

Google Scholar: [Author Only](#) [Title Only](#) [Author and Title](#)

**Baud S, Graham IA (2006) A spatiotemporal analysis of enzymatic activities associated with carbon metabolism in wild-type and mutant embryos of *Arabidopsis* using in situ histochemistry.** *The Plant Journal* 46: 155-169

Google Scholar: [Author Only](#) [Title Only](#) [Author and Title](#)

**Baud S, Lepiniec L (2009) Regulation of de novo fatty acid synthesis in maturing oilseeds of *Arabidopsis*.** *Plant Physiology and Biochemistry* 47: 448-455

Google Scholar: [Author Only](#) [Title Only](#) [Author and Title](#)

**Baud S, Wuillème S, To A, Rochat C, Lepiniec L (2009) Role of WRINKLED1 in the transcriptional regulation of glycolytic and fatty acid biosynthetic genes in *Arabidopsis*.** *The Plant Journal* 60: 933-947

Google Scholar: [Author Only](#) [Title Only](#) [Author and Title](#)

**Borisjuk L, Nguyen TH, Neuberger T, Rutten T, Tschiersch H, Claus B, Feussner I, Webb AG, Jakob P, Weber H, Wobus U, Rolletschek H (2005) Gradients of lipid storage, photosynthesis and plastid differentiation in developing soybean seeds.** *New Phytologist* 167: 761-776

Google Scholar: [Author Only](#) [Title Only](#) [Author and Title](#)

**Buescher JM, Antoniewicz MR, Boros LG, Burgess SC, Brunengraber H, Clish CB, DeBerardinis RJ, Feron O, Frezza C, Ghesquiere B, Gottlieb E, Hiller K, Jones RG, Kamphorst JJ, Kibbey RG, Kimmelman AC, Locasale JW, Lunt SY, Maddocks ODK, Malloy C, Metallo CM, Meuillet EJ, Munger J, Nöh K, Rabinowitz JD, Ralser M, Sauer U, Stephanopoulos G, St-Pierre J, Tennant DA, Wittmann C, Vander Heiden MG, Vazquez A, Voutsden K, Young JD, Zamboni N, Fendt S-M (2015) A roadmap for interpreting 13C metabolite labeling patterns from cells.** *Current Opinion in Biotechnology* 34: 189-201

Google Scholar: [Author Only](#) [Title Only](#) [Author and Title](#)

**Chapman KD, Dyer JM, Mullen RT (2012) Biogenesis and functions of lipid droplets in plants: Thematic Review Series: Lipid Droplet Synthesis and Metabolism: from Yeast to Man.** *Journal of Lipid Research* 53: 215-226

Google Scholar: [Author Only](#) [Title Only](#) [Author and Title](#)

**Chia TYP, Pike MJ, Rawsthorne S (2005) Storage oil breakdown during embryo development of *Brassica napus* (L.).** *Journal of Experimental Botany* 56: 1285-1296

Google Scholar: [Author Only](#) [Title Only](#) [Author and Title](#)

**Clemente TE, Cahoon EB (2009) Soybean Oil: Genetic Approaches for Modification of Functionality and Total Content. *Plant Physiology* 151: 1030-1040**

Google Scholar: [Author Only](#) [Title Only](#) [Author and Title](#)

**Collakova E, Aghamirzaie D, Fang Y, Klumas C, Tabataba F, Kakumanu A, Myers E, Heath LS, Grene R (2013) Metabolic and Transcriptional Reprogramming in Developing Soybean (*Glycine max*) Embryos. *Metabolites* 3: 347-372**

Google Scholar: [Author Only](#) [Title Only](#) [Author and Title](#)

**Czajka JJ, Kambhampati S, Tang YJ, Wang Y, Allen DK (2020) Application of Stable Isotope Tracing to Elucidate Metabolic Dynamics During *Yarrowia lipolytica*  $\alpha$ -Ionone Fermentation. *iScience* 23: 100854**

Google Scholar: [Author Only](#) [Title Only](#) [Author and Title](#)

**Dierking EC, Bilyeu KD (2009) Raffinose and stachyose metabolism are not required for efficient soybean seed germination. *Journal of Plant Physiology* 166: 1329-1335**

Google Scholar: [Author Only](#) [Title Only](#) [Author and Title](#)

**Dyer JM, Stymne S, Green AG, Carlsson AS (2008) High-value oils from plants. *The Plant Journal* 54: 640-655**

Google Scholar: [Author Only](#) [Title Only](#) [Author and Title](#)

**Eastmond PJ, Germain V, Lange PR, Bryce JH, Smith SM, Graham IA (2000) Postgerminative growth and lipid catabolism in oilseeds lacking the glyoxylate cycle. *Proceedings of the National Academy of Sciences* 97: 5669-5674**

Google Scholar: [Author Only](#) [Title Only](#) [Author and Title](#)

**Eastmond PJ, Graham IA (2001) Re-examining the role of the glyoxylate cycle in oilseeds. *Trends in Plant Science* 6: 72-78**

Google Scholar: [Author Only](#) [Title Only](#) [Author and Title](#)

**Egli DB, Bruening WP (2001) Source-sink Relationships, Seed Sucrose Levels and Seed Growth Rates in Soybean. *Annals of Botany* 88: 235-242**

Google Scholar: [Author Only](#) [Title Only](#) [Author and Title](#)

**Fabre F, Planchon C (2000) Nitrogen nutrition, yield and protein content in soybean. *Plant Science* 152: 51-58**

Google Scholar: [Author Only](#) [Title Only](#) [Author and Title](#)

**Fait A, Angelovici R, Less H, Ohad I, Urbanczyk-Wochniak E, Fernie AR, Galili G (2006) Arabidopsis Seed Development and Germination Is Associated with Temporally Distinct Metabolic Switches. *Plant Physiology* 142: 839-854**

Google Scholar: [Author Only](#) [Title Only](#) [Author and Title](#)

**Gawłowska M, Świącicki W, Lahuta L, Kaczmarek Z (2017) Raffinose family oligosaccharides in seeds of *Pisum* wild taxa, type lines for seed genes, domesticated and advanced breeding materials. *Genetic Resources and Crop Evolution* 64: 569-578**

Google Scholar: [Author Only](#) [Title Only](#) [Author and Title](#)

**Gifford RM, John HT (1985) Sucrose Concentration at the Apoplastic Interface between Seed Coat and Cotyledons of Developing Soybean Seeds. *Plant Physiology* 77: 863-868**

Google Scholar: [Author Only](#) [Title Only](#) [Author and Title](#)

**Gomes CI, Obendorf RL, Horbowicz M (2005) myo-Inositol, D-chiro-Inositol, and D-Pinitol Synthesis, Transport, and Galactoside Formation in Soybean Explants. *Crop Science* 45: 1312-1319**

Google Scholar: [Author Only](#) [Title Only](#) [Author and Title](#)

**Hagely KB, Jo H, Kim J-H, Hudson KA, Bilyeu K (2020) Molecular-assisted breeding for improved carbohydrate profiles in soybean seed. *Theoretical and Applied Genetics* 133: 1189-1200**

Google Scholar: [Author Only](#) [Title Only](#) [Author and Title](#)

**Hagely KB, Palmquist D, Bilyeu KD (2013) Classification of Distinct Seed Carbohydrate Profiles in Soybean. *Journal of Agricultural and Food Chemistry* 61: 1105-1111**

Google Scholar: [Author Only](#) [Title Only](#) [Author and Title](#)

**Heinrich P, Kohler C, Ellmann L, Kuerner P, Spang R, Oefner PJ, Dettmer K (2018) Correcting for natural isotope abundance and tracer impurity in MS-, MS/MS- and high-resolution-multiple-tracer-data from stable isotope labeling experiments with IsoCorrector. *Scientific Reports* 8: 17910**

Google Scholar: [Author Only](#) [Title Only](#) [Author and Title](#)

**Hernández-Sebastià C, Marsolais F, Saravitz C, Israel D, Dewey RE, Huber SC (2005) Free amino acid profiles suggest a possible role for asparagine in the control of storage-product accumulation in developing seeds of low- and high-protein soybean lines. *Journal of Experimental Botany* 56: 1951-1963**

Google Scholar: [Author Only](#) [Title Only](#) [Author and Title](#)

**Hsu FC, Bennett AB, Spanswick RM (1984) Concentrations of Sucrose and Nitrogenous Compounds in the Apoplast of Developing Soybean Seed Coats and Embryos. *Plant Physiology* 75: 181-186**

Google Scholar: [Author Only](#) [Title Only](#) [Author and Title](#)

**Hsu FC, Obendorf RL (1982) Compositional analysis of in vitro matured soybean seeds. *Plant Science Letters* 27: 129-135**

Google Scholar: [Author Only](#) [Title Only](#) [Author and Title](#)

**Hu R, Fan C, Li H, Zhang Q, Fu Y-F (2009) Evaluation of putative reference genes for gene expression normalization in soybean by quantitative real-time RT-PCR. BMC Molecular Biology 10: 93**

Google Scholar: [Author Only](#) [Title Only](#) [Author and Title](#)

**Kambhampati S, Aznar-Moreno JA, Hostetler C, Caso T, Bailey SR, Hubbard AH, Durrett TP, Allen DK (2019) On the Inverse Correlation of Protein and Oil: Examining the Effects of Altered Central Carbon Metabolism on Seed Composition Using Soybean Fast Neutron Mutants. Metabolites 10: 18**

Google Scholar: [Author Only](#) [Title Only](#) [Author and Title](#)

**Kambhampati S, Kurepin LV, Kisiala AB, Bruce KE, Cober ER, Morrison MJ, Emery RJN (2017) Yield associated traits correlate with cytokinin profiles in developing pods and seeds of field-grown soybean cultivars. Field Crops Research 214: 175-184**

Google Scholar: [Author Only](#) [Title Only](#) [Author and Title](#)

**Kambhampati S, Li J, Evans BS, Allen DK (2019) Accurate and efficient amino acid analysis for protein quantification using hydrophilic interaction chromatography coupled tandem mass spectrometry. Plant Methods 15: 46**

Google Scholar: [Author Only](#) [Title Only](#) [Author and Title](#)

**Kanai M, Yamada T, Hayashi M, Mano S, Nishimura M (2019) Soybean (Glycine max L.) triacylglycerol lipase GmSDP1 regulates the quality and quantity of seed oil. Scientific Reports 9: 8924**

Google Scholar: [Author Only](#) [Title Only](#) [Author and Title](#)

**Kappelmann J, Klein B, Geilenkirchen P, Noack S (2017) Comprehensive and accurate tracking of carbon origin of LC-tandem mass spectrometry collisional fragments for 13C-MFA. Analytical and Bioanalytical Chemistry 409: 2309-2326**

Google Scholar: [Author Only](#) [Title Only](#) [Author and Title](#)

**Kosina SM, Castillo A, Schnebly SR, Obendorf RL (2009) Soybean seed coat cup unloading on plants with low-raffinose, low-stachyose seeds. Seed Science Research 19: 145-153**

Google Scholar: [Author Only](#) [Title Only](#) [Author and Title](#)

**Kuo TM, VanMiddlesworth JF, Wolf WJ (1988) Content of raffinose oligosaccharides and sucrose in various plant seeds. Journal of Agricultural and Food Chemistry 36: 32-36**

Google Scholar: [Author Only](#) [Title Only](#) [Author and Title](#)

**Leprince O, Pellizzaro A, Berriri S, Buitink J (2016) Late seed maturation: drying without dying. Journal of Experimental Botany 68: 827-841**

Google Scholar: [Author Only](#) [Title Only](#) [Author and Title](#)

**Li L, Hur M, Lee J-Y, Zhou W, Song Z, Ransom N, Demirkale CY, Nettleton D, Westgate M, Arendsee Z, Iyer V, Shanks J, Nikolau B, Wurtele ES (2015) A systems biology approach toward understanding seed composition in soybean. BMC Genomics 16: S9**

Google Scholar: [Author Only](#) [Title Only](#) [Author and Title](#)

**Licht M (2014) Soybean Growth and Development. In, Vol 2019, Iowa State University Extension and Outreach**

Google Scholar: [Author Only](#) [Title Only](#) [Author and Title](#)

**Lin W, Oliver DJ (2008) Role of triacylglycerols in leaves. Plant Science 175: 233-237**

Google Scholar: [Author Only](#) [Title Only](#) [Author and Title](#)

**McCleary BV, Charmier LMJ, McKie VA (2019) Measurement of Starch: Critical Evaluation of Current Methodology. Starch - Stärke 71: 1800146**

Google Scholar: [Author Only](#) [Title Only](#) [Author and Title](#)

**McCleary BV, Gibson TS, Mugford DC, Collaborators (1997) Measurement of Total Starch in Cereal Products by Amyloglucosidase- $\alpha$ -Amylase Method: Collaborative Study. Journal of AOAC INTERNATIONAL 80: 571-579**

Google Scholar: [Author Only](#) [Title Only](#) [Author and Title](#)

**Mello Filho Old, Sediama CS, Moreira MA, Reis MS, Massoni GA, Piovesan ND (2004) Grain yield and seed quality of soybean selected for high protein content. Pesquisa Agropecuária Brasileira 39: 445-450**

Google Scholar: [Author Only](#) [Title Only](#) [Author and Title](#)

**Naeve SL (2005) Soybean growth stages. In, Vol 2019, University of Minnesota Extension**

Google Scholar: [Author Only](#) [Title Only](#) [Author and Title](#)

**O'Grady J, Schwender J, Shachar-Hill Y, Morgan JA (2012) Metabolic cartography: experimental quantification of metabolic fluxes from isotopic labelling studies. Journal of Experimental Botany 63: 2293-2308**

Google Scholar: [Author Only](#) [Title Only](#) [Author and Title](#)

**Osorio S, Vallarino JG, Szcwowska M, Ufaz S, Tzin V, Angelovici R, Galili G, Aarabi F (2014) Extraction and Measurement the Activities of Cytosolic Phosphoenolpyruvate Carboxykinase (PEPCK) and Plastidic NADP-dependent Malic Enzyme (ME) on Tomato (Solanum lycopersicum). Bio-protocol 4: e1122**

Google Scholar: [Author Only](#) [Title Only](#) [Author and Title](#)

**Patil G, Mian R, Vuong T, Pantalone V, Song Q, Chen P, Shannon GJ, Carter TC, Nguyen HT (2017) Molecular mapping and genomics of soybean seed protein: a review and perspective for the future. Theoretical and Applied Genetics 130: 1975-1991**

Google Scholar: [Author Only](#) [Title Only](#) [Author and Title](#)

**Pipolo AE, Sinclair TR, Camara GMS (2004) Protein and oil concentration of soybean seed cultured in vitro using nutrient solutions of differing glutamine concentration. *Annals of Applied Biology* 144: 223-227**

Google Scholar: [Author Only](#) [Title Only](#) [Author and Title](#)

**Quoc Thien N, Anna K, Peter A, Emery RJN, Suresh N (2016) Soybean Seed Development: Fatty Acid and Phytohormone Metabolism and Their Interactions. *Current Genomics* 17: 241-260**

Google Scholar: [Author Only](#) [Title Only](#) [Author and Title](#)

**Rainbird RM, Thorne JH, Hardy RWF (1984) Role of Amides, Amino Acids, and Ureides in the Nutrition of Developing Soybean Seeds. *Plant Physiology* 74: 329-334**

Google Scholar: [Author Only](#) [Title Only](#) [Author and Title](#)

**Raymond R, Spiteri A, Dieuaide M, Gerhardt B, Pradet A (1992) Peroxisomal beta - oxidation of fatty acids and citrate formation by a particulate fraction from early germinating sunflower seeds. 30: 153-161**

Google Scholar: [Author Only](#) [Title Only](#) [Author and Title](#)

**Rolletschek H, Radchuk R, Klukas C, Schreiber F, Wobus U, Borisjuk L (2005) Evidence of a key role for photosynthetic oxygen release in oil storage in developing soybean seeds. *New Phytologist* 167: 777-786**

Google Scholar: [Author Only](#) [Title Only](#) [Author and Title](#)

**Rolletschek H, Schwender J, König C, Chapman KD, Romsdahl T, Lorenz C, Braun HP, Denolf P, Van Audenhove K, Munz E, Heinzel N, Ortleb S, Rutten T, McCorkle S, Borysyuk T, Guendel A, Shi H, Vander Auwermeulen M, Bourrot S, Borisjuk L (2020) Cellular Plasticity in Response to Suppression of Storage Proteins in the *Brassica napus* Embryo. *Plant Cell* 32: 2383-2401**

Google Scholar: [Author Only](#) [Title Only](#) [Author and Title](#)

**Rolletschek H, Weber H, Borisjuk L (2003) Energy Status and Its Control on Embryogenesis of Legumes. Embryo Photosynthesis Contributes to Oxygen Supply and Is Coupled to Biosynthetic Fluxes. *Plant Physiology* 132: 1196-1206**

Google Scholar: [Author Only](#) [Title Only](#) [Author and Title](#)

**Ruuska SA, Schwender J, Ohlrogge JB (2004) The Capacity of Green Oilseeds to Utilize Photosynthesis to Drive Biosynthetic Processes. *Plant Physiology* 136: 2700-2709**

Google Scholar: [Author Only](#) [Title Only](#) [Author and Title](#)

**Salon C, Raymond P, Pradet A (1988) Quantification of carbon fluxes through the tricarboxylic acid cycle in early germinating lettuce embryos. *Journal of Biological Chemistry* 263: 12278-12287**

Google Scholar: [Author Only](#) [Title Only](#) [Author and Title](#)

**Sánchez-Mata MC, Peñuela-Teruel MJ, Cámara-Hurtado M, Díez-Marqués C, Torija-Isasa ME (1998) Determination of Mono-, Di-, and Oligosaccharides in Legumes by High-Performance Liquid Chromatography Using an Amino-Bonded Silica Column. *Journal of Agricultural and Food Chemistry* 46: 3648-3652**

Google Scholar: [Author Only](#) [Title Only](#) [Author and Title](#)

**Schillinger JADE, Bilyeu KD (2013) Soybeans having high germination rates and ultra-low raffinose and stachyose content. In USPTO, ed, Vol 8471107, USA**

Google Scholar: [Author Only](#) [Title Only](#) [Author and Title](#)

**Schillinger JADE, Bilyeu KD (2018) Soybeans having high germination rates and ultra-low raffinose and stachyose content. In USPTO, ed, Vol 10081814, USA**

Google Scholar: [Author Only](#) [Title Only](#) [Author and Title](#)

**Schwender J, Goffman F, Ohlrogge JB, Shachar-Hill Y (2004) Rubisco without the Calvin cycle improves the carbon efficiency of developing green seeds. *Nature* 432: 779-782**

Google Scholar: [Author Only](#) [Title Only](#) [Author and Title](#)

**Schwender J, Ohlrogge JB (2002) Probing in Vivo Metabolism by Stable Isotope Labeling of Storage Lipids and Proteins in Developing (*Brassica napus*) Embryos. *Plant Physiology* 130: 347-361**

Google Scholar: [Author Only](#) [Title Only](#) [Author and Title](#)

**Schwender J, Shachar-Hill Y, Ohlrogge JB (2006) Mitochondrial Metabolism in Developing Embryos of *Brassica napus*. *Journal of Biological Chemistry* 281: 34040-34047**

Google Scholar: [Author Only](#) [Title Only](#) [Author and Title](#)

**Singh SK, Barnaby JY, Reddy VR, Sicher RC (2016) Varying Response of the Concentration and Yield of Soybean Seed Mineral Elements, Carbohydrates, Organic Acids, Amino Acids, Protein, and Oil to Phosphorus Starvation and CO<sub>2</sub> Enrichment. *Frontiers in Plant Science* 7**

Google Scholar: [Author Only](#) [Title Only](#) [Author and Title](#)

**Team RC (2013) A language and environment for statistical computing. In R Foundation for Statistical Computing, Vienna, Austria**

Google Scholar: [Author Only](#) [Title Only](#) [Author and Title](#)

**Thompson JF, Madison JT, Muenster A-ME (1977) In vitro Culture of Immature Cotyledons of Soya Bean (*Glycine max* L. Merr.). *Annals of Botany* 41: 29-39**

Google Scholar: [Author Only](#) [Title Only](#) [Author and Title](#)

**Truong Q, Koch K, Yoon JM, Everard JD, Shanks JV (2013) Influence of carbon to nitrogen ratios on soybean somatic embryo (cv. Jack) growth and composition. Journal of Experimental Botany 64: 2985-2995**

Google Scholar: [Author Only](#) [Title Only](#) [Author and Title](#)

**Tschiersch H, Borisjuk L, Rutten T, Rolletschek H (2011) Gradients of seed photosynthesis and its role for oxygen balancing. Biosystems 103: 302-308**

Google Scholar: [Author Only](#) [Title Only](#) [Author and Title](#)

**Valentine MF, De Tar JR, Mookkan M, Firman JD, Zhang ZJ (2017) Silencing of Soybean Raffinose Synthase Gene Reduced Raffinose Family Oligosaccharides and Increased True Metabolizable Energy of Poultry Feed. Frontiers in Plant Science 8**

Google Scholar: [Author Only](#) [Title Only](#) [Author and Title](#)

**Walker RP, Chen Z-H, Técsi LI, Famiani F, Lea PJ, Leegood RC (1999) Phosphoenolpyruvate carboxykinase plays a role in interactions of carbon and nitrogen metabolism during grape seed development. Planta 210: 9-18**

Google Scholar: [Author Only](#) [Title Only](#) [Author and Title](#)

**Wickham H (2016) ggplot2: Elegant Graphics for Data Analysis. Springer Publishing Company, Incorporated**

Google Scholar: [Author Only](#) [Title Only](#) [Author and Title](#)
